# Supplementary material for: Extraction and analysis of signatures from the Gene Expression Omnibus by the crowd
Source: PubMed Central journal article supplement (PMC5052684; doi:10.1038/ncomms12846), 2016-09-26
Supplement: ncomms12846-s1.pdf [file ncomms12846-s1.pdf]

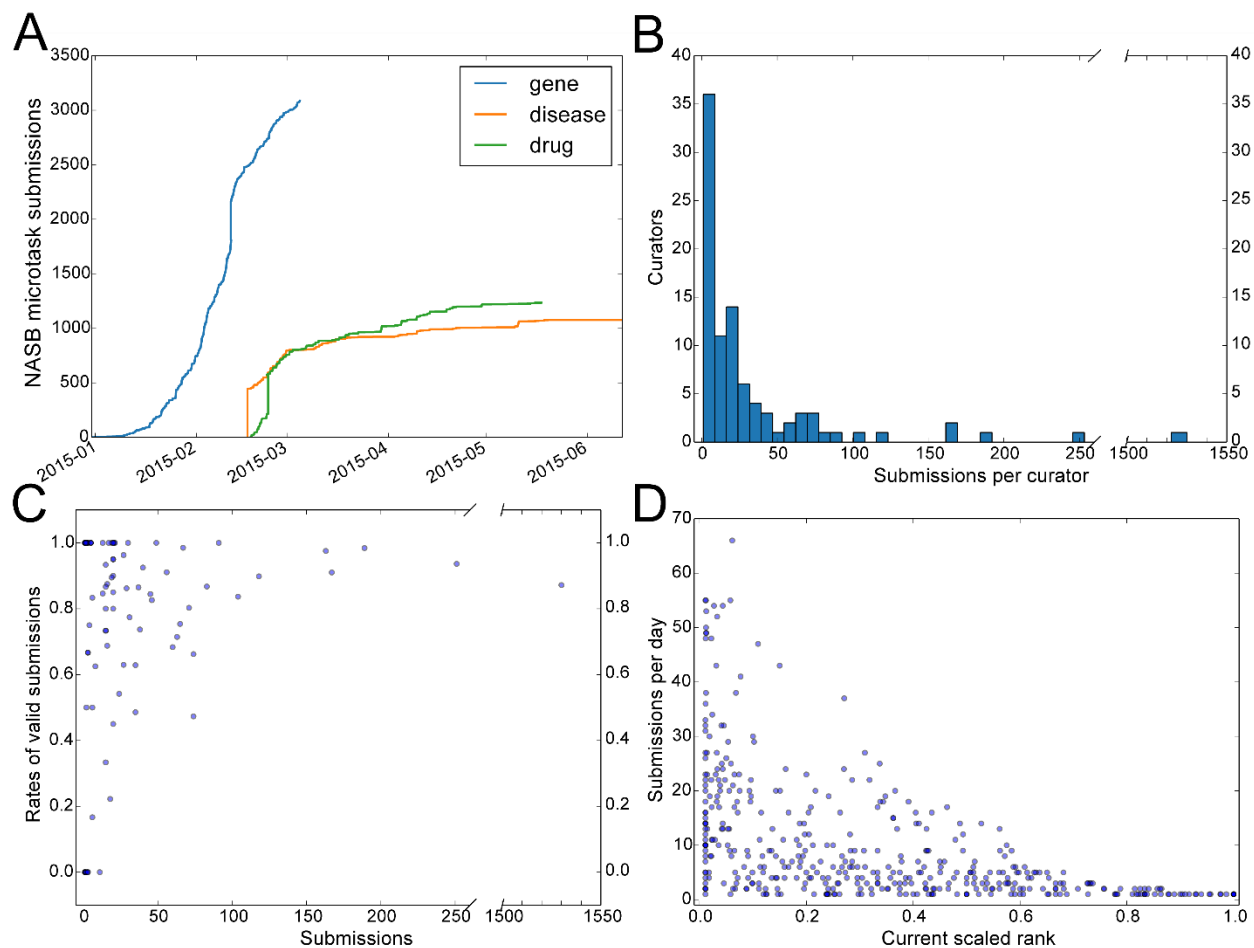

**Supplementary figure 1. Descriptive statistics of the crowdsourced submissions.** (A) Line chart showing the number of submissions over time; single-gene perturbations, disease signatures, and single-drug perturbations are plotted in blue, orange, and green, respectively. (B) Histogram of the distribution of signature submissions per curator. (C) Scatter plot of the relationship between the number of submissions per user and the number of valid submissions. (D) Scatter plot of the relationship between the leadership board ranks and the number of daily submissions made by each curator.

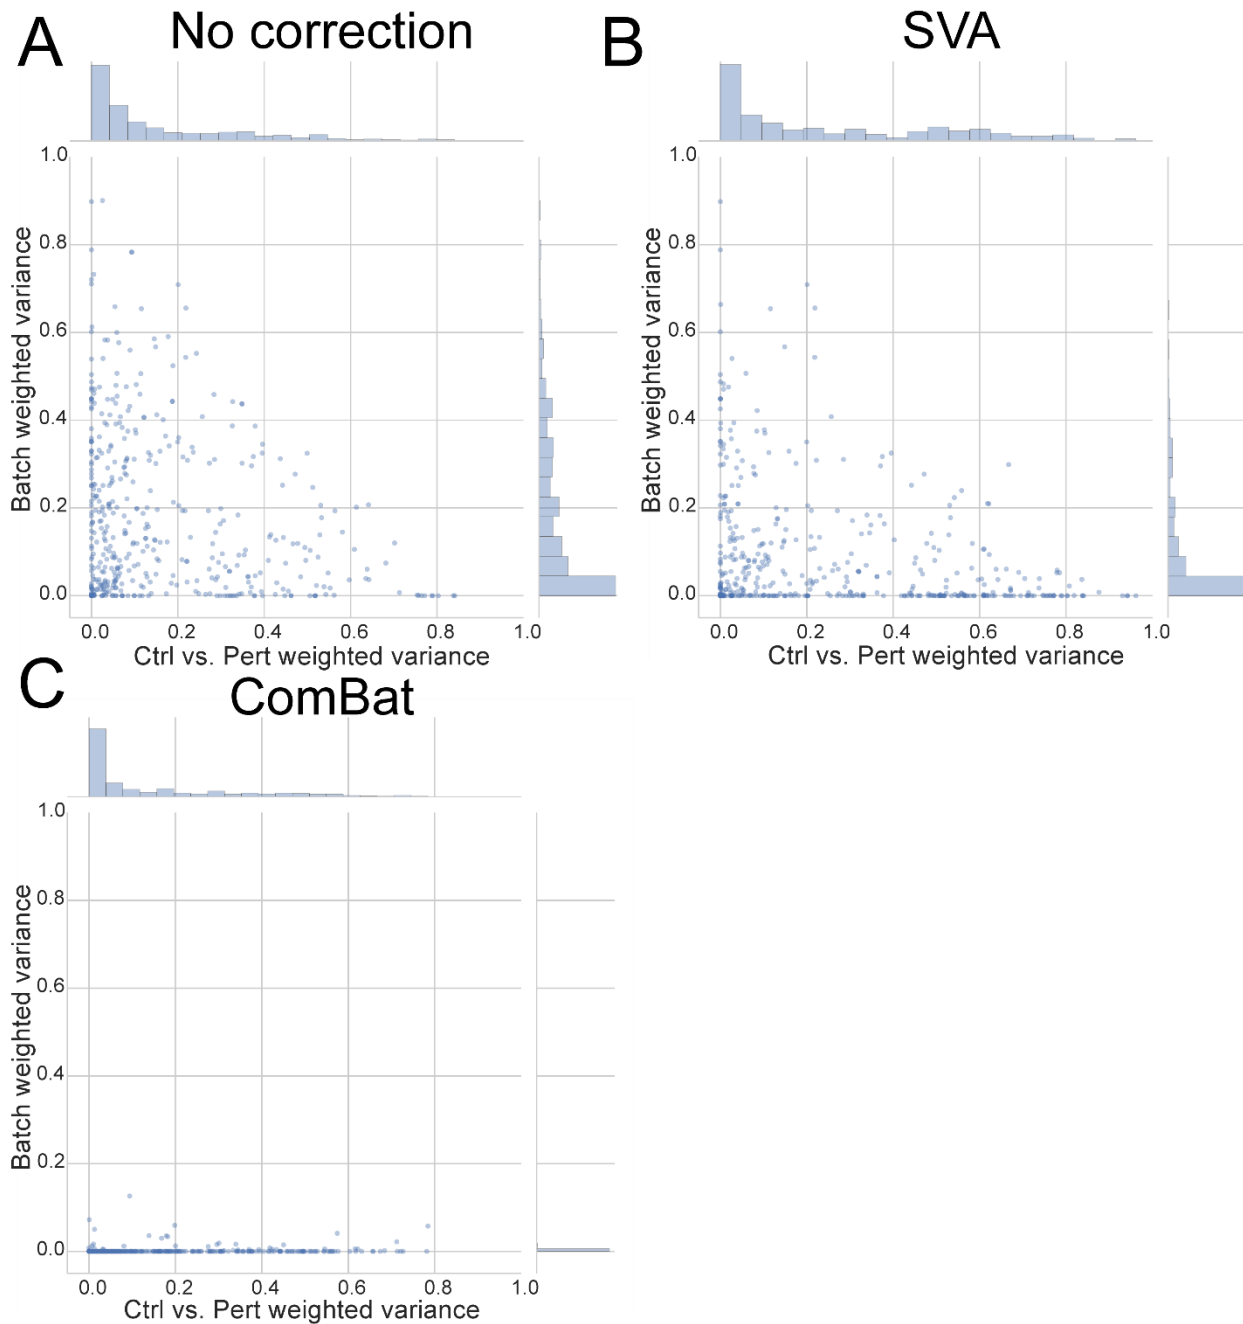

**Supplementary figure 2. Quantification of batch effects.** Scatter plots of the weighted variance attributed to batch effects vs. that attributed to the effects of the experimental perturbations. (A) Without correction; (B) Corrected by SVA; and (C) Corrected by ComBat. The histograms on top and right side of the scatter plots show the distribution of weighted variances.

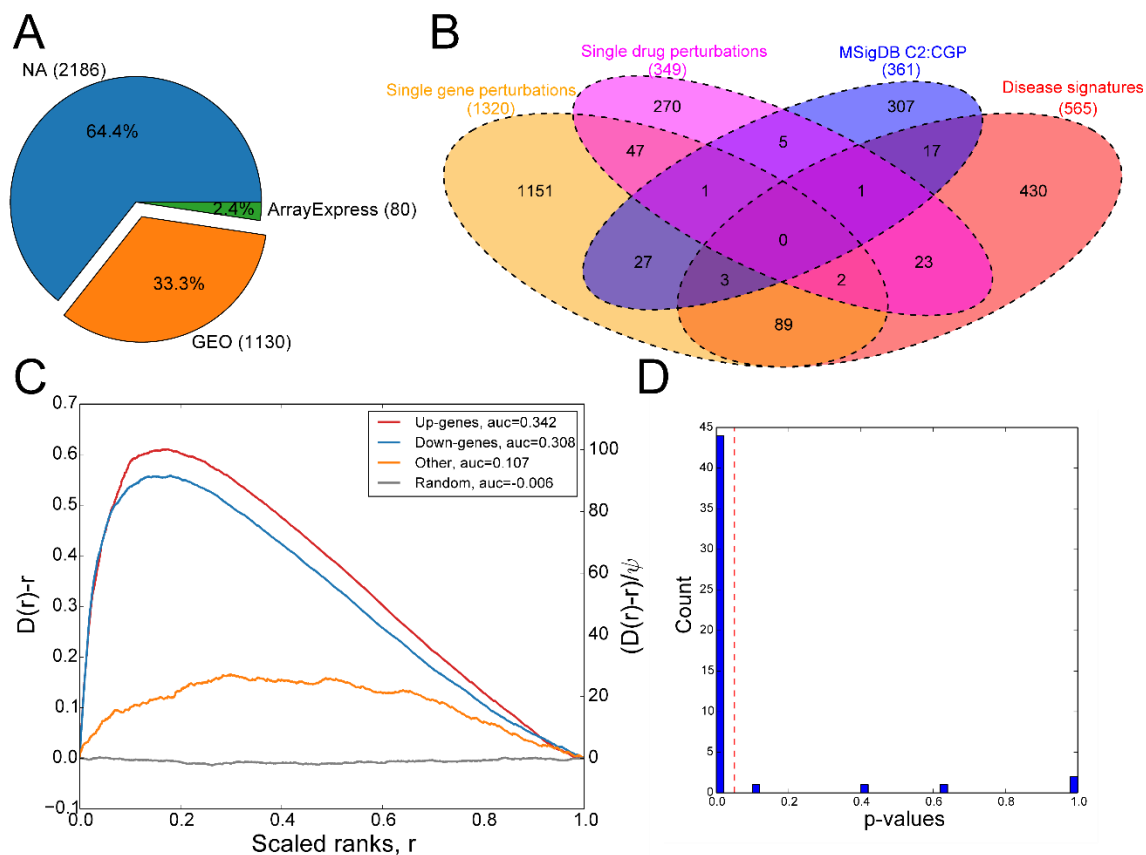

**Supplementary figure 3. Comparison between curated signatures from MSigDB and CREEDS.** (A) Pie chart showing the number of MSigDB curated gene sets from literature with the portion of corresponding publicly available microarray data. (B) Venn diagram showing the overlap of GEO studies among the three CREEDS collections, and the curated signatures in MSigDB. (C) Line chart showing the deviation of the cumulative distribution from uniform distribution for the scaled ranks of gene sets curated by MSigDB and their matched CREEDS signatures. (D) Histogram of Fisher's exact test p-values showing the number of matched signatures with significant overlaps between MSigDB and CREEDS.

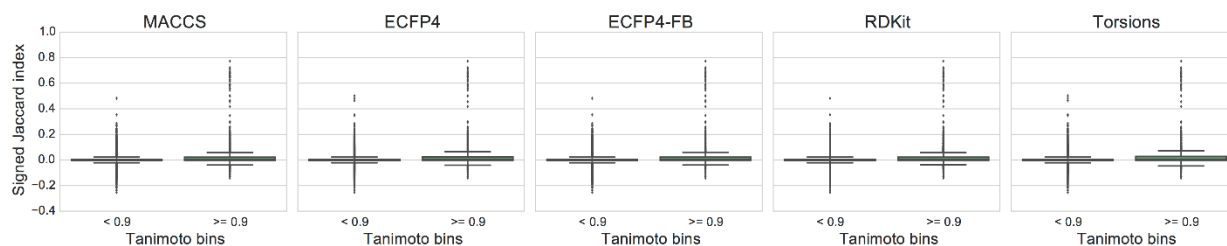

**Supplementary figure 4. Chemical structural similarity and gene expression signature similarity.** Boxplots show the distribution of signed Jaccard indexes of drug pairs that are highly and lowly structurally similar based on Tanimoto scores computed by different chemical structural fingerprint algorithms: MACCS, ECFP4, feature-based ECFP4, RDKit, and Torsions.

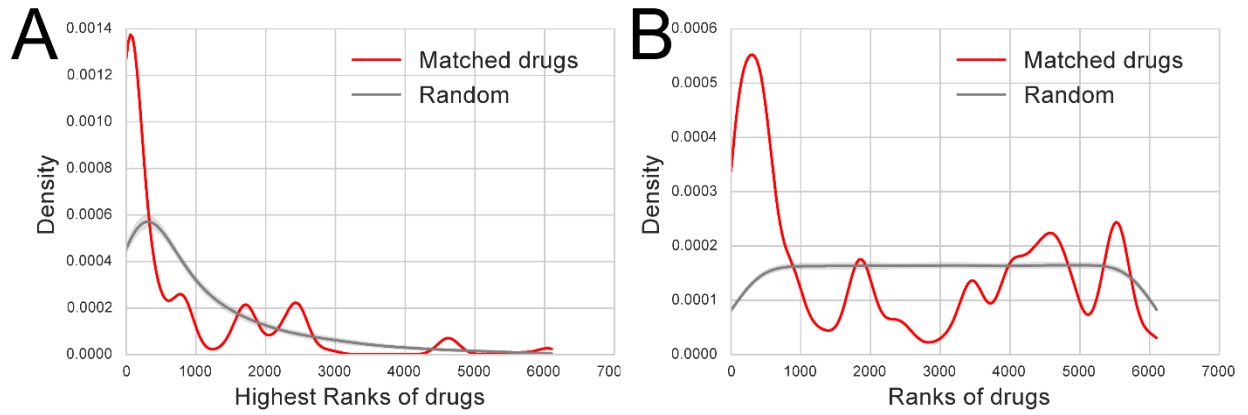

**Supplementary figure 5. Distributions of the ranks of matched drug perturbations between signatures from CREEDS queried against signatures from the original initial version of the Connectivity Map (CMAP) dataset.** The highest ranks and all of the ranks of the matched drugs when using drug perturbation signatures from CREEDS to query against the 6,100 drug perturbation signatures in the CMAP dataset are plotted in (A) and (B), respectively.

Crowd Extracted Expression of Differential Signatures

### Search

**Metadata Signature Search**  
 Examples: TP53, Breast cancer, Imatinib

Search for signatures... Search by term

---

**Signature Search**  
 Search signatures by up and down gene sets

[Try an example](#)

**Up genes**

Up genes

**Down genes**

Down genes

**Database versions:**

v1.0  v1.1  v2.0

v1.0 contains the original crowdsourcing signatures.  
 v1.1 includes ~3,000 drug signatures generated in rats from the [Drug Matrix dataset](#).  
 v2.0 includes ~14,000 automatically generated signatures by text classification models based on the descriptions associated with GEO studies and samples.

Search similar signatures Search opposite signatures

### Visualize

**Bubble Chart**

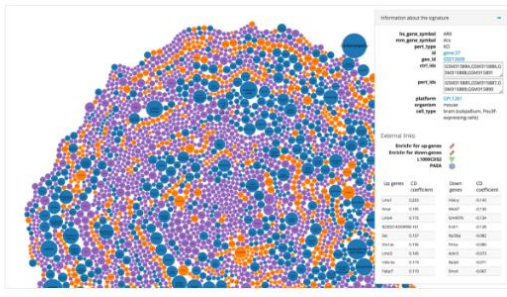

**Clustergram**



### Downloads

| Dataset | Category                  | Signatures | Annotations       | JSON              | GMT               |
|---------|---------------------------|------------|-------------------|-------------------|-------------------|
| v1.0    | Single gene perturbations | 2177       | <a href="#">🔗</a> | <a href="#">🔗</a> | <a href="#">🔗</a> |
| v1.0    | Disease signatures        | 828        | <a href="#">🔗</a> | <a href="#">🔗</a> | <a href="#">🔗</a> |
| v1.0    | Single drug perturbations | 1221       | <a href="#">🔗</a> | <a href="#">🔗</a> | <a href="#">🔗</a> |
| DM      | Single drug perturbations | 3938       | <a href="#">🔗</a> | <a href="#">🔗</a> | <a href="#">🔗</a> |
| v2.0    | Single gene perturbations | 8620       | <a href="#">🔗</a> | <a href="#">🔗</a> | <a href="#">🔗</a> |
| v2.0    | Disease signatures        | 1430       | <a href="#">🔗</a> | <a href="#">🔗</a> | <a href="#">🔗</a> |
| v2.0    | Single drug perturbations | 4295       | <a href="#">🔗</a> | <a href="#">🔗</a> | <a href="#">🔗</a> |

### API

[API documentation](#)  
[Notebook tutorials](#)

- [Python notebook](#)
- [R Markdown](#)

[Contribution guide](#)

Supplementary figure 6. Screenshot from the landing page of the CREEDS portal (<http://amp.pharm.mssm.edu/creeds>).

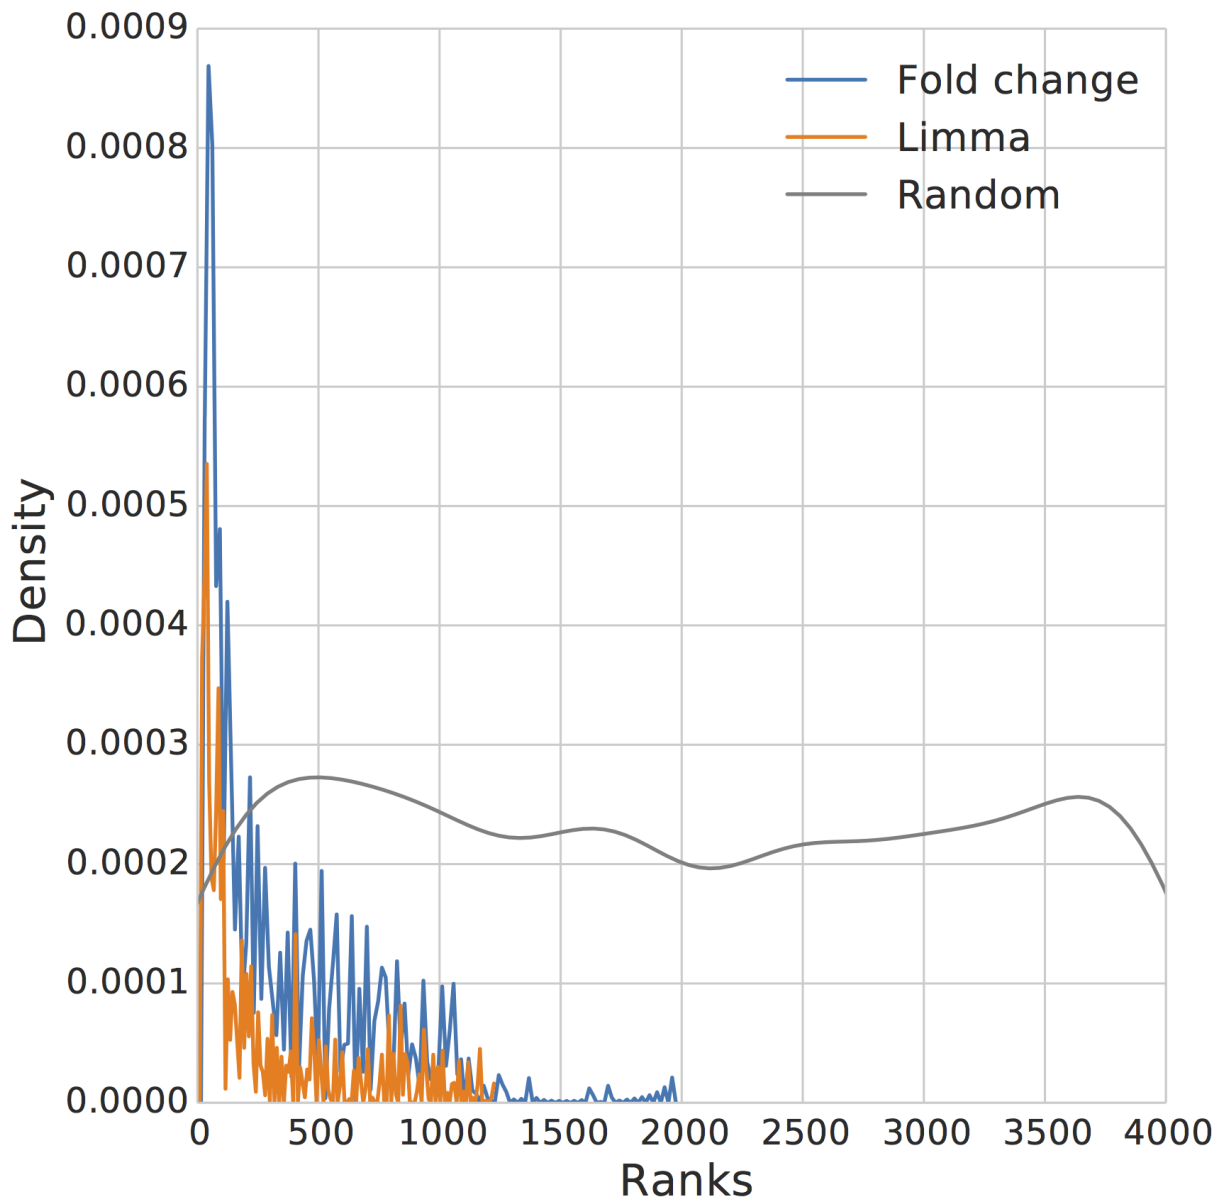

**Supplementary figure 7. Comparing differential expression methods to query results against the CREEDS collection.** The plot shows the distribution of ranks of matched signatures using the up or down genes identified by two different methods: fold change (blue) and Limma (orange) to create input of gene lists to be queried against the CREEDS database.

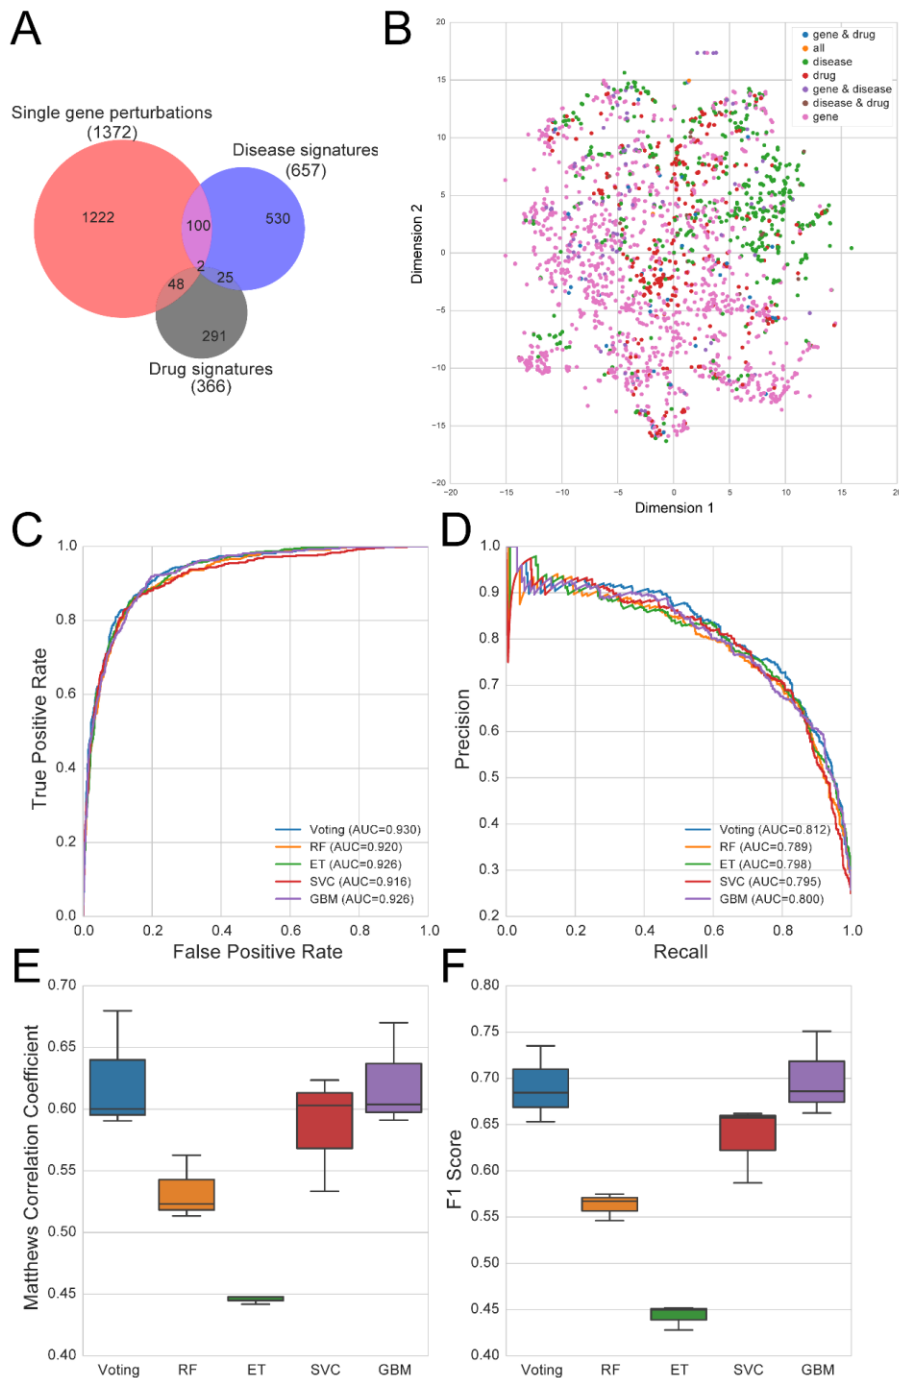

**Supplementary figure 8. Natural language analysis of GEO studies using the extracted signatures as a training set.** (A) Venn diagram showing the overlap between GEO series collected by the crowd for the three collections and used as a training set. (B) t-SNE visualization of textural features extracted from the summary of the GEO studies. The performance of different classifiers to categorize GEO studies as containing (or not) disease signatures (C-F). (C-F) Different evaluation metrics including AUROC, Area under the Precision-Recall Curve (AUPRC) Matthews correlation coefficient, and F1 score. Abbreviations: Random Forest (RF), Extra Trees (ET), Support Vector Classifier (SVC), and Gradient Boosting Machine (GBM).

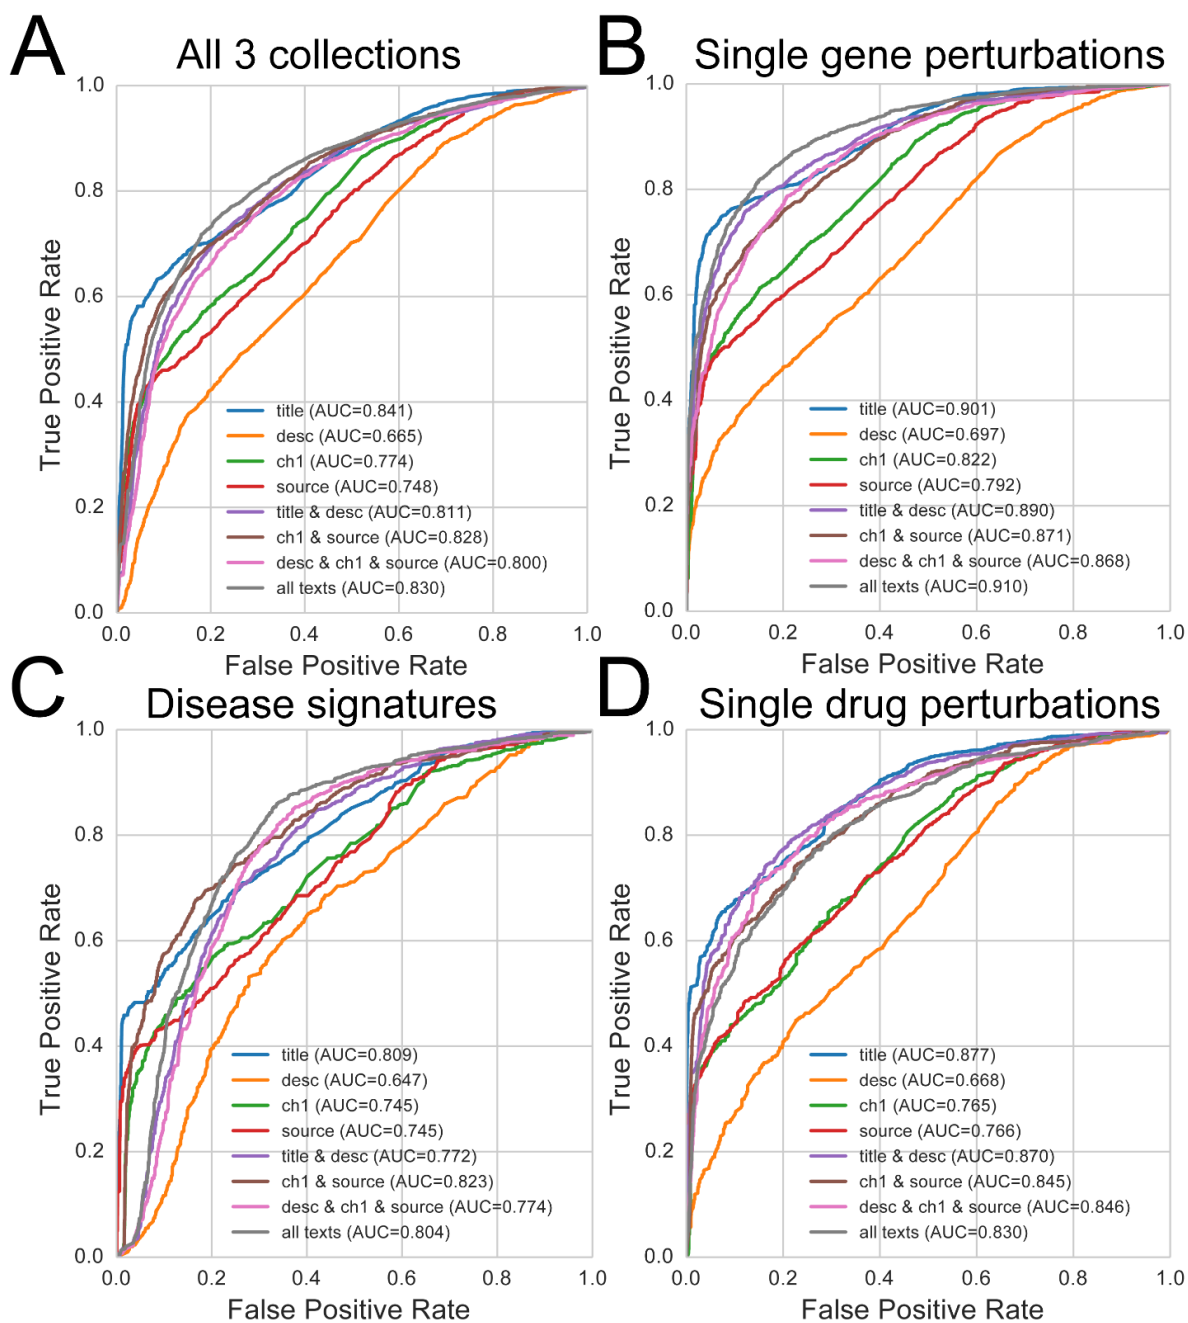

**Supplementary figure 9. Performance evaluations of binary classifiers for predicting control vs. perturbation of samples.** The ROC curves of different subsets of text features extracted from the “Title”, “Description” (desc), “Sample characteristics” (ch1), and “Sample source name” (source) of samples (GSMs) from the GEO studies, as well as different combinations of those subsets, are plotted in different colors.



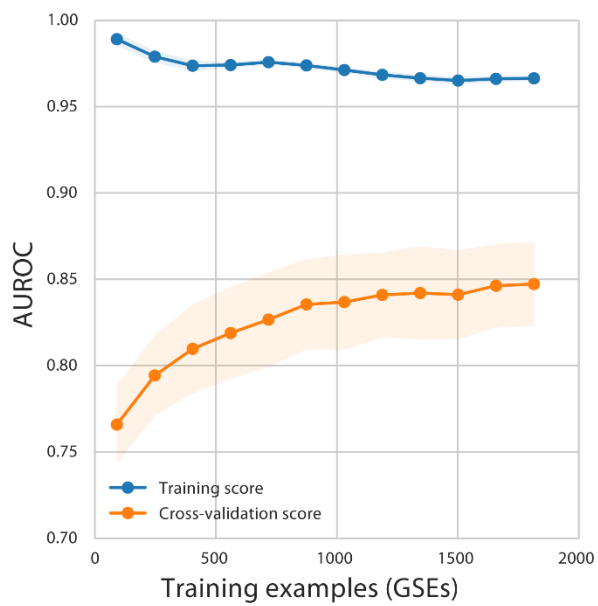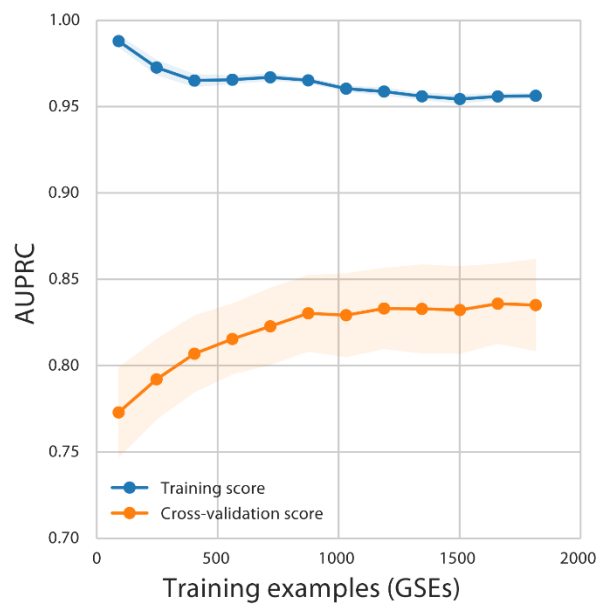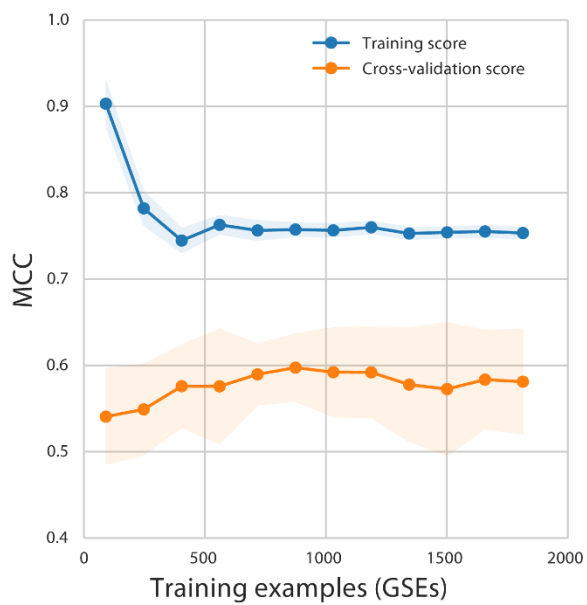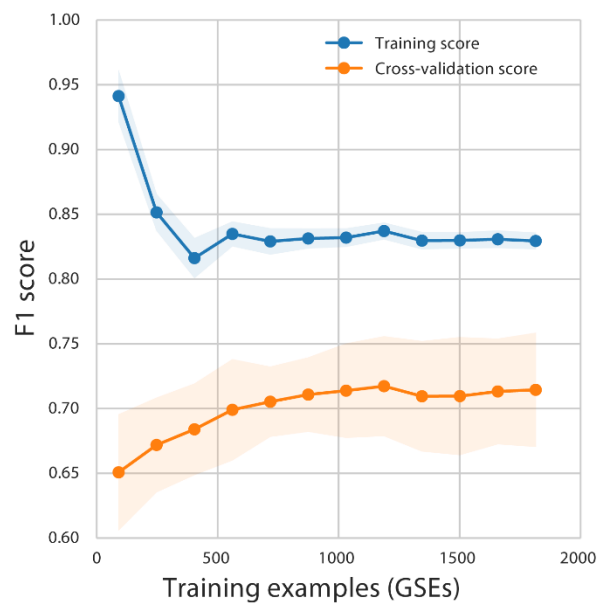

**Supplementary figure 10. Learning curves of classification models predicting whether samples are control or perturbations for the three collections of annotated GEO studies.**

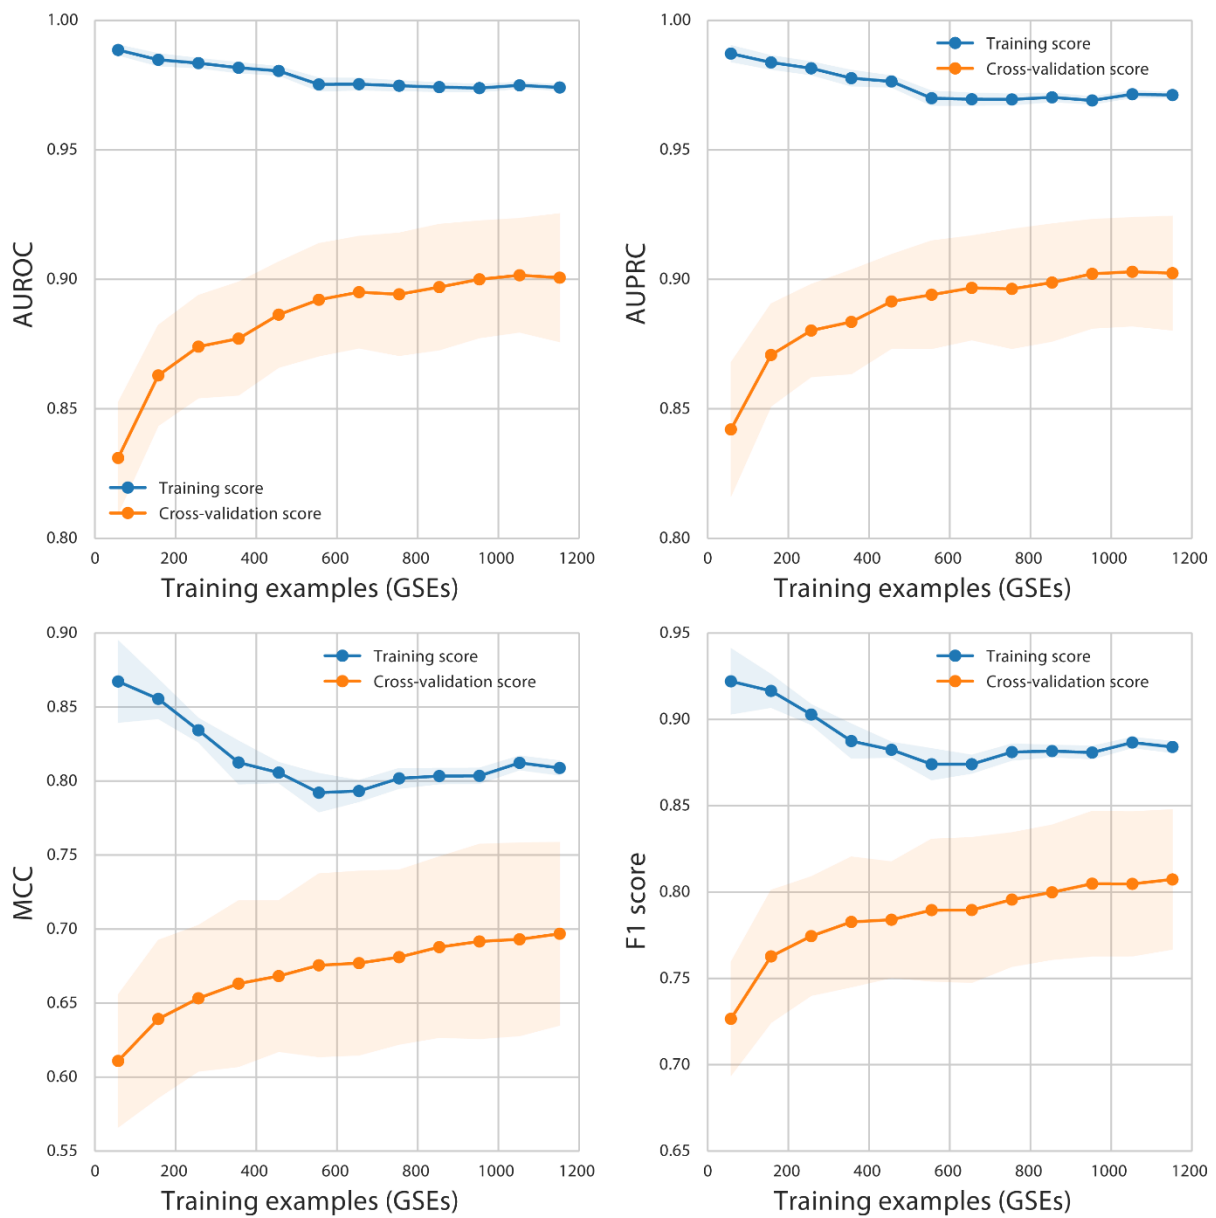

**Supplementary figure 11. Learning curves of classification models predicting whether samples are control or perturbations for annotated single-gene perturbation.**

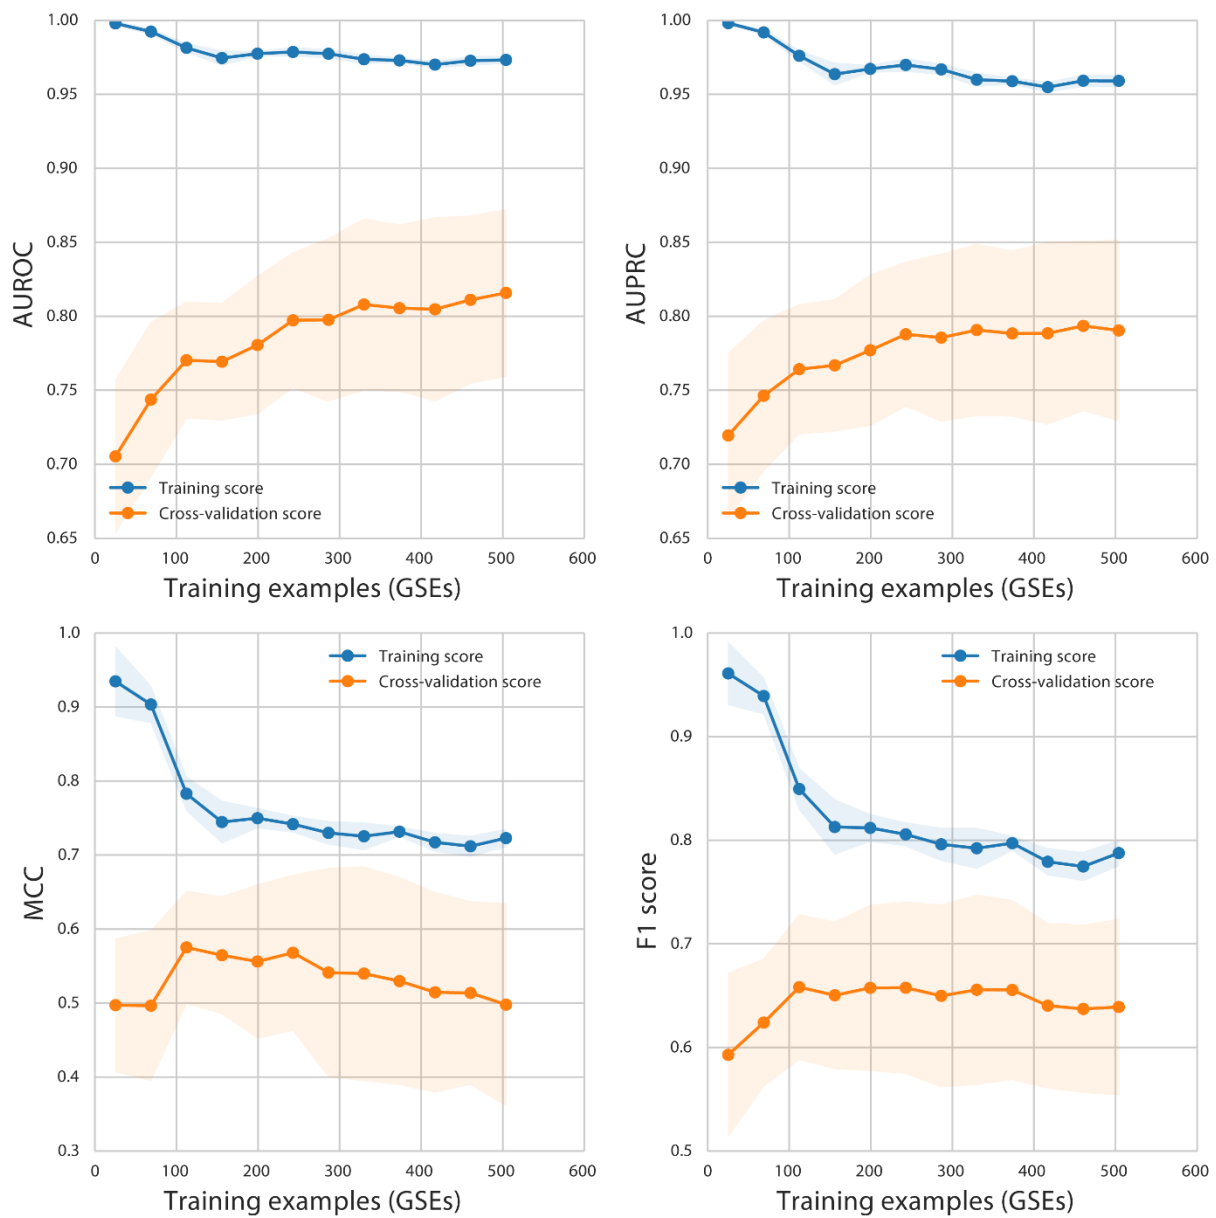

**Supplementary figure 12. Learning curves of classification models predicting whether samples are control or perturbations for annotated GEO studies that generate disease signatures.**

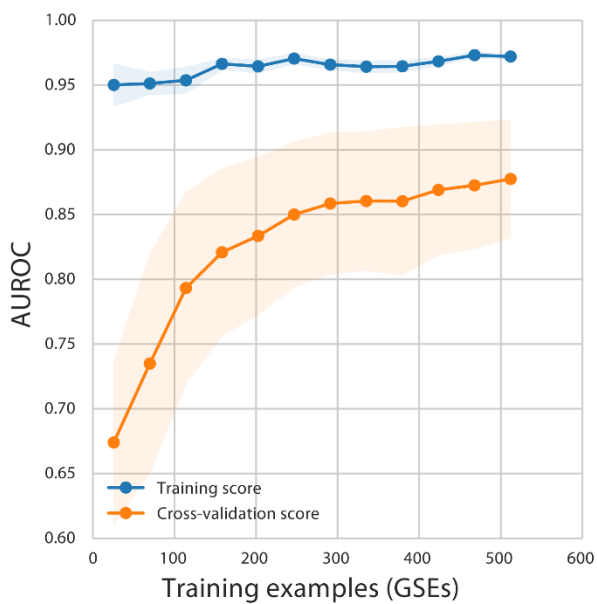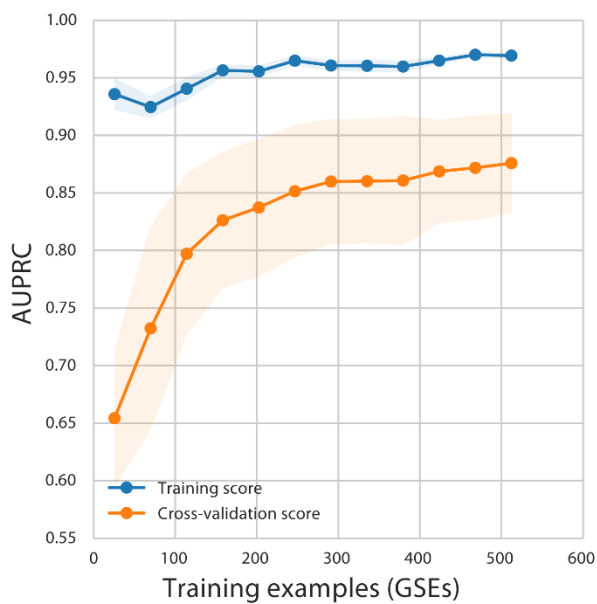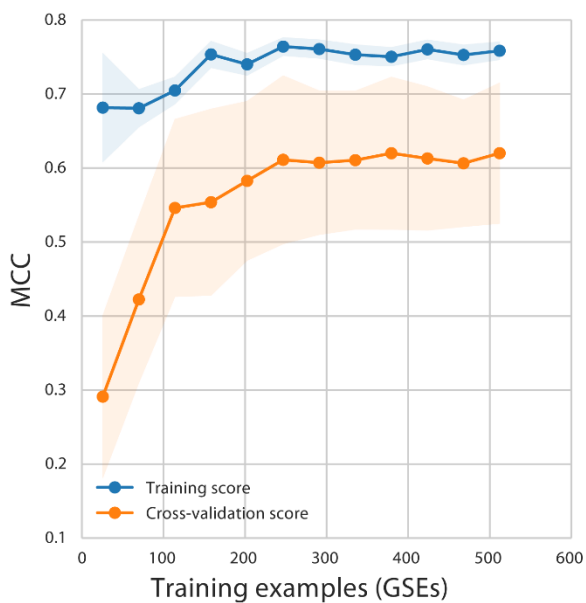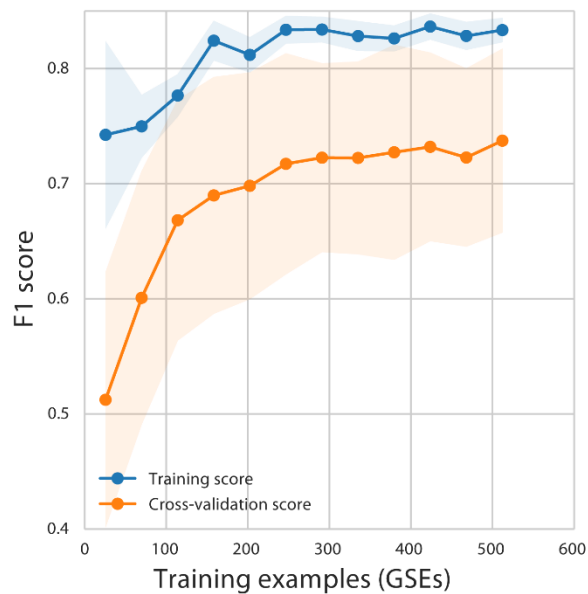

**Supplementary figure 13. Learning curves of classification models predicting whether samples are control or perturbations for annotated single-drug perturbation.**

Supplementary table 1. Details about matched signatures from MSigDB and CREEDS that do not have significant overlap

| CREEDS ID | GEO ID   | Control IDs                      | Perturbation IDs                    | MSigDB Standard Name  | MSigDB Exact Source     | Number of Genes in MSigDB | p-value | Reason                                                                        |
|-----------|----------|----------------------------------|-------------------------------------|-----------------------|-------------------------|---------------------------|---------|-------------------------------------------------------------------------------|
| gene:1317 | GSE6078  | GSM140792<br>GSM140816           | GSM140813<br>GSM140817<br>GSM140818 | HE_PTEN_TARGETS_UP    | Fig 2e:<br>red in Mut   | 15                        | 1       | Authors only showed the subset of genes that are related to cell-cycle        |
| gene:1317 | GSE6078  | GSM140792<br>GSM140816           | GSM140813<br>GSM140817<br>GSM140818 | HE_PTEN_TARGETS_DN    | Fig 2e:<br>green in Mut | 7                         | 0.105   | Authors only showed the subset of genes that are related to cell-cycle        |
| gene:2842 | GSE15102 | GSM377671<br>GSM377675           | GSM377676<br>GSM377677<br>GSM377678 | SAGIV_CD24_TARGETS_UP | Table 1B                | 22                        | 0.407   | Authors showed genes differentially expressed in both siRNA and mAb induction |
| gene:2842 | GSE15102 | GSM377671<br>GSM377675           | GSM377676<br>GSM377677<br>GSM377678 | SAGIV_CD24_TARGETS_DN | Table 1A                | 45                        | 0.627   | Authors showed genes differentially expressed in both siRNA and mAb induction |
| gene:754  | GSE4356  | GSM99043<br>GSM99044<br>GSM99045 | GSM99058<br>GSM99059<br>GSM99060    | SOUCEK_MYC_TARGETS    | Fig. 1aS                | 7                         | 1       | MSigDB curation error: curated genes do not match original figure             |

Supplementary table 2. Pairs of most similar gene perturbation signatures

| Rank | gse_i    | pert_type_i      | hs_gene_symbol_i | cell_i                          | gse_j    | pert_type_j          | hs_gene_symbol_j | cell_j                   | score | known connection |
|------|----------|------------------|------------------|---------------------------------|----------|----------------------|------------------|--------------------------|-------|------------------|
| 1    | GSE6614  | KO               | CHRNA4           | whole brain                     | GSE5320  | Deficiency           | CHRN4            | Brain                    | 1     | TRUE             |
| 2    | GSE4065  | Mutation - R225Q | PRKAG3           | Skeletal muscle (gastrocnemius) | GSE4067  | Mutation (R225Q)     | PRKAG3           | Skeletal muscle          | 0.766 | TRUE             |
| 3    | GSE6397  | H222P mutation   | LMNA             | heart                           | GSE8000  | KO                   | LMNA             | whole heart              | 0.466 | TRUE             |
| 4    | GSE1472  | Deficiency       | DMD              | Leg muscle                      | GSE1025  | Deficiency           | DMD              | Hindlimb muscle          | 0.435 | TRUE             |
| 5    | GSE1025  | Deficiency       | DMD              | Hindlimb muscle                 | GSE1026  | Deficiency           | DMD              | Diaphragm                | 0.429 | TRUE             |
| 6    | GSE897   | Deficiency       | DMD              | Quadriceps                      | GSE1025  | Deficiency           | DMD              | Hindlimb muscle          | 0.416 | TRUE             |
| 7    | GSE466   | KO               | DMD              | muscle                          | GSE1025  | Deficiency           | DMD              | Hindlimb muscle          | 0.415 | TRUE             |
| 8    | GSE2527  | KD               | GATA1            | megakaryocytes                  | GSE2433  | Truncated Expression | GATA1            | Fetal liver              | 0.411 | TRUE             |
| 9    | GSE34388 | KO               | DES              | young skeletal muscles          | GSE41363 | KO                   | DES              | tibialis anterior        | 0.408 | TRUE             |
| 10   | GSE41363 | KO               | DES              | tibialis anterior               | GSE34388 | depletion            | DES              | tibialis anterior muscle | 0.399 | TRUE             |

|    |          |                  |        |                                 |          |                                 |        |                                |        |       |
|----|----------|------------------|--------|---------------------------------|----------|---------------------------------|--------|--------------------------------|--------|-------|
| 11 | GSE1472  | Deficiency       | DMD    | Leg muscle                      | GSE466   | KO                              | DMD    | muscle                         | 0.393  | TRUE  |
| 12 | GSE2152  | mutation         | FH     | Uterine fibroid tissue          | GSE2724  | Heterozygous germline mutations | FH     | uterine fibroid and Myometrium | 0.377  | TRUE  |
| 13 | GSE897   | Deficiency       | DMD    | Gastroc                         | GSE1025  | Deficiency                      | DMD    | Hindlimb muscle                | 0.375  | TRUE  |
| 14 | GSE2527  | KD               | GATA1  | megakaryocytes                  | GSE2433  | DeltaN mutation                 | GATA1  | megacariocytes                 | 0.371  | TRUE  |
| 15 | GSE28025 | KO               | MYBL1  | Testis from 17 day old          | GSE27568 | KO                              | UBB    | Testis                         | 0.369  | FALSE |
| 16 | GSE1472  | Deficiency       | DMD    | Leg muscle                      | GSE897   | Deficiency                      | DMD    | Gastroc                        | 0.366  | TRUE  |
| 17 | GSE466   | KO               | DMD    | muscle                          | GSE1025  | Deficiency                      | DMD    | Hindlimb muscle                | 0.363  | TRUE  |
| 18 | GSE466   | KO               | DMD    | muscle                          | GSE1026  | Deficiency                      | DMD    | Diaphram                       | 0.355  | TRUE  |
| 19 | GSE466   | KO               | DMD    | muscle                          | GSE897   | Deficiency                      | DMD    | Quadriceps                     | 0.351  | TRUE  |
| 20 | GSE1472  | Deficiency       | DMD    | Leg muscle                      | GSE897   | Deficiency                      | DMD    | Quadriceps                     | 0.350  | TRUE  |
| 21 | GSE27261 | KO               | DMRT1  | P28 testis tissue               | GSE27568 | KO                              | UBB    | Testis                         | 0.349  | FALSE |
| 22 | GSE466   | KO               | DMD    | muscle                          | GSE897   | Deficiency                      | DMD    | Gastroc                        | 0.346  | TRUE  |
| 23 | GSE897   | Deficiency       | DMD    | Extensor digitorum longus       | GSE1025  | Deficiency                      | DMD    | Hindlimb muscle                | 0.343  | TRUE  |
| 24 | GSE1025  | Deficiency       | DMD    | Hindlimb muscle                 | GSE1026  | Deficiency                      | DMD    | Diaphram                       | 0.340  | TRUE  |
| 25 | GSE4065  | Mutation - R225Q | PRKAG3 | Skeletal muscle (gastrocnemius) | GSE4063  | KO                              | PRKAG3 | Skeletal muscle                | -0.340 | TRUE  |
| 26 | GSE4063  | KO               | PRKAG3 | Skeletal muscle                 | GSE4067  | Mutation (R225Q)                | PRKAG3 | Skeletal muscle                | -0.338 | TRUE  |
| 27 | GSE897   | Deficiency       | DMD    | Quadriceps                      | GSE1025  | Deficiency                      | DMD    | Hindlimb muscle                | 0.337  | TRUE  |
| 28 | GSE466   | KO               | DMD    | muscle                          | GSE1025  | Deficiency                      | DMD    | Hindlimb muscle                | 0.336  | TRUE  |
| 29 | GSE9038  | CAG knock in     | HTT    | cerebellum                      | GSE19780 | knock-in                        | HTT    | cerebellum                     | 0.334  | TRUE  |
| 30 | GSE466   | KO               | DMD    | muscle                          | GSE897   | Deficiency                      | DMD    | Extensor digitorum longus      | 0.333  | TRUE  |
| 31 | GSE897   | Deficiency       | DMD    | Soleus                          | GSE1026  | Deficiency                      | DMD    | Diaphram                       | 0.333  | TRUE  |
| 32 | GSE1025  | Deficiency       | DMD    | Hindlimb muscle                 | GSE1026  | Deficiency                      | DMD    | Diaphram                       | 0.332  | TRUE  |
| 33 | GSE20325 | OE               | CTNNB1 | Embryonic kidney                | GSE9629  | KO                              | CTNNB1 | Kidney                         | 0.330  | TRUE  |
| 34 | GSE466   | KO               | DMD    | muscle                          | GSE1026  | Deficiency                      | DMD    | Diaphram                       | 0.328  | TRUE  |
| 35 | GSE3889  | mutation         | SCD    | liver                           | GSE39621 | KO                              | NPC1   | liver                          | 0.326  | FALSE |
| 36 | GSE466   | KO               | DMD    | muscle                          | GSE897   | Deficiency                      | DMD    | Quadriceps                     | 0.324  | TRUE  |
| 37 | GSE28025 | KO               | MYBL1  | Testis from 17 day old          | GSE27568 | KO                              | UBB    | Testis                         | 0.323  | FALSE |
| 38 | GSE1472  | Deficiency       | DMD    | Leg muscle                      | GSE1025  | Deficiency                      | DMD    | Hindlimb muscle                | 0.322  | TRUE  |
| 39 | GSE897   | Deficiency       | DMD    | Quadriceps                      | GSE1025  | Deficiency                      | DMD    | Hindlimb muscle                | 0.319  | TRUE  |

|    |          |            |       |                               |          |                      |        |                                  |        |       |
|----|----------|------------|-------|-------------------------------|----------|----------------------|--------|----------------------------------|--------|-------|
| 40 | GSE65624 | KO         | INSR  | Liver tissue                  | GSE3129  | Snell mutant PIT1-dw | POU1F1 | liver                            | -0.317 | FALSE |
| 41 | GSE1472  | Deficiency | DMD   | Leg muscle                    | GSE897   | Deficiency           | DMD    | Quadriceps                       | 0.316  | TRUE  |
| 42 | GSE1472  | Deficiency | DMD   | Leg muscle                    | GSE1026  | Deficiency           | DMD    | Diaphragm                        | 0.316  | TRUE  |
| 43 | GSE1025  | Deficiency | DMD   | Hindlimb muscle - 56 Days     | GSE1026  | Deficiency           | DMD    | Diaphragm                        | 0.315  | TRUE  |
| 44 | GSE466   | KO         | DMD   | muscle                        | GSE1026  | Deficiency           | DMD    | Diaphragm                        | 0.315  | TRUE  |
| 45 | GSE466   | KO         | DMD   | muscle                        | GSE897   | Deficiency           | DMD    | Extensor digitorum longus        | 0.315  | TRUE  |
| 46 | GSE1472  | Deficiency | DMD   | Leg muscle                    | GSE1026  | Deficiency           | DMD    | Diaphragm                        | 0.311  | TRUE  |
| 47 | GSE6078  | KO         | PTEN  | Analysis of intestinal polyps | GSE22020 | KO                   | AP1B1  | small intestine, epithelial cell | 0.310  | FALSE |
| 48 | GSE897   | Deficiency | DMD   | Gastroc (mdx mice)            | GSE1025  | Deficiency           | DMD    | Hindlimb muscle                  | 0.305  | TRUE  |
| 49 | GSE1472  | Deficiency | DMD   | Leg muscle                    | GSE1025  | Deficiency           | DMD    | Hindlimb muscle                  | 0.304  | TRUE  |
| 50 | GSE12049 | Deficiency | LAMA2 | Hind limb skeletal muscle     | GSE3252  | Deficiency           | LAMA2  | Diaphragm                        | 0.302  | TRUE  |

Supplementary table 3. Pairs of most similar disease vs. normal tissue signatures

| Rank | gse_i    | name_i                      | cell_i                         | platform_i | gse_j    | name_j                      | cell_j                       | platform_j | score | known connection |
|------|----------|-----------------------------|--------------------------------|------------|----------|-----------------------------|------------------------------|------------|-------|------------------|
| 1    | GSE16677 | Down syndrome               | megakaryocytic leukemia blasts | GPL570     | GSE19681 | Down syndrome               | leukemic blasts              | GPL570     | 0.485 | TRUE             |
| 2    | GSE4130  | Dehydration                 | Hypothalamus                   | GPL1355    | GSE3110  | Dehydration                 | Hypothalamus                 | GPL1355    | 0.481 | TRUE             |
| 3    | GSE6798  | polycystic ovary syndrome   | Skeletal muscle                | GPL570     | GSE8157  | polycystic ovary syndrome   | Skeletal muscle              | GPL570     | 0.450 | TRUE             |
| 4    | GSE19429 | myelodysplastic syndrome    | CD34+ hematopoietic stem cells | GPL570     | GSE4619  | anemia                      | CD34+ cells                  | GPL570     | 0.437 | FALSE            |
| 5    | GSE19429 | myelodysplastic syndrome    | CD34+ hematopoietic stem cells | GPL570     | GSE4619  | anemia                      | CD34+ cells                  | GPL570     | 0.427 | FALSE            |
| 6    | GSE1685  | Fracture of femur           | Femur                          | GPL85      | GSE1371  | Fracture of femur           | Femur                        | GPL85      | 0.402 | TRUE             |
| 7    | GSE466   | Duchenne muscular dystrophy | Muscle - Striated (Skeletal)   | GPL81      | GSE1472  | Duchenne muscular dystrophy | Muscle - Striated (Skeletal) | GPL32      | 0.393 | TRUE             |
| 8    | GSE19429 | myelodysplastic syndrome    | CD34+ hematopoietic stem cells | GPL570     | GSE4619  | anemia                      | CD34+ cells                  | GPL570     | 0.389 | FALSE            |
| 9    | GSE19429 | myelodysplastic syndrome    | CD34+ hematopoietic stem cells | GPL570     | GSE4619  | anemia                      | CD34+ cells                  | GPL570     | 0.356 | FALSE            |
| 10   | GSE2527  | thrombocytopenia            | Megakaryocyte                  | GPL1261    | GSE2433  | megakaryocytic leukemia     | Megakaryocyte                | GPL1261    | 0.354 | FALSE            |
| 11   | GSE1685  | Fracture of femur           | Femur                          | GPL85      | GSE594   | Bone fracture               | Femur                        | GPL85      | 0.343 | FALSE            |
| 12   | GSE594   | Bone fracture               | Femur                          | GPL85      | GSE1371  | Fracture of femur           | Femur                        | GPL85      | 0.342 | FALSE            |
| 13   | GSE19780 | Huntington's disease        | cerebellum                     | GPL1261    | GSE9038  | Huntington's disease        | cerebellum                   | GPL1261    | 0.334 | TRUE             |

|    |          |                                |                                        |         |          |                             |                                                                        |         |       |       |
|----|----------|--------------------------------|----------------------------------------|---------|----------|-----------------------------|------------------------------------------------------------------------|---------|-------|-------|
| 14 | GSE4619  | MDS - Myelodysplastic syndrome | Bone marrow stem cell                  | GPL570  | GSE19429 | myelodysplastic syndrome    | CD34+ hematopoietic stem cells                                         | GPL570  | 0.325 | TRUE  |
| 15 | GSE775   | acute myocardial infarction    | Heart left ventricles above LAD artery | GPL81   | GSE1621  | Cardiac Hypertrophy         | Myocardial tissue                                                      | GPL81   | 0.313 | FALSE |
| 16 | GSE1551  | dermatomyositis                | Muscle - Striated (Skeletal)           | GPL96   | GSE3112  | Polymyositis                | Muscle tissue                                                          | GPL96   | 0.311 | FALSE |
| 17 | GSE4619  | MDS - Myelodysplastic syndrome | Bone marrow stem cell                  | GPL570  | GSE19429 | myelodysplastic syndrome    | CD34+ hematopoietic stem cells                                         | GPL570  | 0.307 | TRUE  |
| 18 | GSE2724  | uterine fibroid                | Uterus                                 | GPL96   | GSE2725  | uterine fibroid             | Uterus                                                                 | GPL96   | 0.301 | TRUE  |
| 19 | GSE775   | acute myocardial infarction    | Heart left ventricles above LAD artery | GPL81   | GSE1472  | Duchenne muscular dystrophy | Muscle - Striated (Skeletal)                                           | GPL32   | 0.295 | FALSE |
| 20 | GSE3889  | Hypercholesteremia             | Hepatic Tissue                         | GPL1261 | GSE2127  | hepatocellular carcinoma    | Hepatic Tissue                                                         | GPL339  | 0.294 | FALSE |
| 21 | GSE7999  | Tachycardia                    | Myocardial tissue                      | GPL1355 | GSE4105  | myocardial infarction       | Myocardial tissue                                                      | GPL341  | 0.294 | FALSE |
| 22 | GSE34619 | Barrett's esophagus            | Esophagus endoscopic biopsies          | GPL6244 | GSE13083 | Barrett's esophagus         | Esophageal squamous epithelium                                         | GPL96   | 0.294 | TRUE  |
| 23 | GSE34619 | Barrett's esophagus            | esophagus                              | GPL6244 | GSE13083 | Barrett's esophagus         | Esophageal squamous epithelium                                         | GPL96   | 0.294 | TRUE  |
| 24 | GSE775   | acute myocardial infarction    | Heart left ventricles above LAD artery | GPL81   | GSE466   | Duchenne muscular dystrophy | Muscle - Striated (Skeletal)                                           | GPL81   | 0.287 | FALSE |
| 25 | GSE4619  | MDS - Myelodysplastic syndrome | Bone marrow stem cell                  | GPL570  | GSE19429 | myelodysplastic syndrome    | CD34+ hematopoietic stem cells                                         | GPL570  | 0.286 | TRUE  |
| 26 | GSE17612 | schizophrenia                  | Anterior prefrontal cortex             | GPL570  | GSE21935 | schizophrenia               | Superior temporal cortex                                               | GPL570  | 0.281 | TRUE  |
| 27 | GSE1379  | breast cancer                  | Mammary Gland Tissue                   | GPL1223 | GSE1378  | breast cancer               | Mammary Gland Tissue                                                   | GPL1223 | 0.281 | TRUE  |
| 28 | GSE1025  | Duchenne muscular dystrophy    | Muscle - Striated (Skeletal)           | GPL81   | GSE1472  | Duchenne muscular dystrophy | Muscle - Striated (Skeletal)                                           | GPL32   | 0.280 | TRUE  |
| 29 | GSE4619  | MDS - Myelodysplastic syndrome | Bone marrow stem cell                  | GPL570  | GSE19429 | myelodysplastic syndrome    | CD34+ hematopoietic stem cells                                         | GPL570  | 0.280 | TRUE  |
| 30 | GSE4619  | anemia                         | CD34+ cells                            | GPL570  | GSE19429 | myelodysplastic syndrome    | HSC cells                                                              | GPL570  | 0.278 | FALSE |
| 31 | GSE19780 | Huntington's disease           | striatum                               | GPL1261 | GSE9038  | Huntington's disease        | Striatum                                                               | GPL1261 | 0.274 | TRUE  |
| 32 | GSE5389  | bipolar disorder               | frontal cortex                         | GPL96   | GSE5392  | bipolar disorder            | brain tissue (dorsolateral prefrontal cortex and orbitofrontal cortex) | GPL96   | 0.273 | TRUE  |
| 33 | GSE19429 | myelodysplastic syndrome       | CD34+ hematopoietic stem cells         | GPL570  | GSE4619  | anemia                      | CD34+ cells                                                            | GPL570  | 0.268 | FALSE |
| 34 | GSE1871  | Acute Lung Injury              | Lung Tissue                            | GPL1261 | GSE2640  | pulmonary fibrosis          | Lung Tissue                                                            | GPL339  | 0.267 | FALSE |
| 35 | GSE466   | Duchenne muscular dystrophy    | Muscle - Striated (Skeletal)           | GPL81   | GSE1026  | Duchenne muscular dystrophy | Muscle - Striated (Skeletal) – Diaphragm                               | GPL81   | 0.265 | TRUE  |
| 36 | GSE1025  | Duchenne muscular dystrophy    | Muscle - Striated (Skeletal)           | GPL81   | GSE466   | Duchenne muscular dystrophy | Muscle - Striated (Skeletal)                                           | GPL81   | 0.264 | TRUE  |



|    |          |                                   |                                        |         |          |                                |                                                     |        |       |       |
|----|----------|-----------------------------------|----------------------------------------|---------|----------|--------------------------------|-----------------------------------------------------|--------|-------|-------|
| 37 | GSE1025  | Duchenne muscular dystrophy       | Muscle - Striated (Skeletal)           | GPL81   | GSE1026  | Duchenne muscular dystrophy    | Muscle - Striated (Skeletal) - Diaphragm            | GPL81  | 0.251 | TRUE  |
| 38 | GSE4619  | MDS - Myelodysplastic syndrome    | Bone marrow stem cell                  | GPL570  | GSE19429 | myelodysplastic syndrome       | HSC cells                                           | GPL570 | 0.248 | TRUE  |
| 39 | GSE1472  | Duchenne muscular dystrophy       | Muscle - Striated (Skeletal)           | GPL32   | GSE1026  | Duchenne muscular dystrophy    | Muscle - Striated (Skeletal) - Diaphragm            | GPL81  | 0.247 | TRUE  |
| 40 | GSE13355 | Psoriasis vulgaris                | Skin tissue                            | GPL570  | GSE14905 | Psoriasis vulgaris             | Skin tissue                                         | GPL570 | 0.247 | TRUE  |
| 41 | GSE3112  | Polymyositis                      | Muscle tissue                          | GPL96   | GSE6011  | Duchenne muscular dystrophy    | Quadriceps                                          | GPL96  | 0.247 | FALSE |
| 42 | GSE19429 | myelodysplastic syndrome          | CD34+ hematopoietic stem cells         | GPL570  | GSE4619  | anemia                         | CD34+ cells                                         | GPL570 | 0.245 | FALSE |
| 43 | GSE775   | acute myocardial infarction       | Heart left ventricles above LAD artery | GPL81   | GSE4710  | Heart Injury                   | Myocardial tissue                                   | GPL339 | 0.244 | FALSE |
| 44 | GSE1156  | Generalized seizures              | Hippocampus                            | GPL85   | GSE4236  | status epilepticus             | CNS - Brain - Hippocampus                           | GPL85  | 0.243 | FALSE |
| 45 | GSE6710  | Psoriasis vulgaris                | Skin tissue                            | GPL96   | GSE2503  | skin squamous cell carcinoma   | Normal skin and squamous cell carcinoma (SCC) tumor | GPL96  | 0.242 | FALSE |
| 46 | GSE1551  | dermatomyositis                   | Muscle - Striated (Skeletal)           | GPL96   | GSE11971 | childhood type dermatomyositis | Skeletal muscle biopsies                            | GPL96  | 0.240 | TRUE  |
| 47 | GSE4290  | oligodendroglioma                 | CNS - Brain                            | GPL570  | GSE15824 | oligodendroglioma              | Brain tumor tissue samples of human gliomas         | GPL570 | 0.239 | TRUE  |
| 48 | GSE8000  | Emery-Dreifuss muscular dystrophy | whole heart                            | GPL1261 | GSE4710  | Heart Injury                   | Myocardial tissue                                   | GPL339 | 0.237 | FALSE |
| 49 | GSE775   | acute myocardial infarction       | Heart left ventricles above LAD artery | GPL81   | GSE1026  | Duchenne muscular dystrophy    | Muscle - Striated (Skeletal) - Diaphragm            | GPL81  | 0.236 | FALSE |
| 50 | GSE6710  | Psoriasis vulgaris                | Skin tissue                            | GPL96   | GSE6475  | acne                           | Skin                                                | GPL571 | 0.235 | FALSE |

Supplementary table 4. Pairs of most similar drug perturbation signatures

| Rank | gse_i    | name_i                        | cell_i                                           | platform_i | gse_j    | name_j          | cell_j                             | platform_j | score | Tanimoto coefficient |
|------|----------|-------------------------------|--------------------------------------------------|------------|----------|-----------------|------------------------------------|------------|-------|----------------------|
| 1    | GSE1839  | Diethylstilbestrol            | uterus                                           | GPL81      | GSE2195  | Estradiol       | Uterus                             | GPL81      | 0.482 | 0.141                |
| 2    | GSE46924 | Estradiol                     | MCF-7                                            | GPL570     | GSE8597  | Estradiol       | NA                                 | GPL570     | 0.418 | 1.000                |
| 3    | GSE51207 | Cobalt dichloride hexahydrate | H4IIEC3 liver cell line                          | GPL1355    | GSE31503 | NICKEL CHLORIDE | H4-II-E-C3 LIVER-derived cell line | GPL1355    | 0.354 | 0.000                |
| 4    | GSE51207 | Cobalt dichloride hexahydrate | H4IIEC3 liver cell line                          | GPL1355    | GSE31503 | NICKEL CHLORIDE | H4-II-E-C3 LIVER-derived cell line | GPL1355    | 0.285 | 0.000                |
| 5    | GSE12211 | imatinib (glivec)             | Philadelphia chromosome positive CML CD34+ cells | GPL571     | GSE29828 | EPZ004777       | MV4 -11 leukemia cell line         | GPL570     | 0.265 | 0.177                |
| 6    | GSE1839  | Diethylstilbestrol            | Uterus                                           | GPL81      | GSE2195  | Estradiol       | Uterus                             | GPL81      | 0.264 | 0.141                |
| 7    | GSE1839  | Diethylstilbestrol            | Uterus                                           | GPL81      | GSE2195  | Estradiol       | Uterus                             | GPL81      | 0.246 | 0.141                |
| 8    | GSE12211 | imatinib (glivec)             | Philadelphia chromosome positive CML CD34+ cells | GPL571     | GSE23743 | Imatinib        | NA                                 | GPL571     | 0.245 | 0.915                |

|    |          |               |                                  |         |          |               |                                    |         |       |       |
|----|----------|---------------|----------------------------------|---------|----------|---------------|------------------------------------|---------|-------|-------|
| 9  | GSE5080  | Harman        | Astrocytes                       | GPL570  | GSE5023  | CYFLUTHRIN    | primary fetal ASTROCYTES           | GPL570  | 0.242 | 0.175 |
| 10 | GSE53394 | Estradiol     | MCF-7                            | GPL96   | GSE4025  | Tamoxifen     | MCF-7                              | GPL96   | 0.238 | 0.070 |
| 11 | GSE17624 | Bisphenol A   | Ishikawa endometrial cells       | GPL570  | GSE8588  | PBDE 47       | Adrenocortical carcinoma cell line | GPL570  | 0.234 | 0.175 |
| 12 | GSE1922  | Imatinib      | K562 leukemia cell line          | GPL96   | GSE19567 | Nilotinib     | K562 cells                         | GPL571  | 0.231 | 0.510 |
| 13 | GSE4668  | Estradiol     | NA                               | GPL96   | GSE4025  | Tamoxifen     | MCF-7                              | GPL96   | 0.229 | 0.070 |
| 14 | GSE54711 | PLX4032       | WM164 BRAF mutant Melanoma cells | GPL6244 | GSE50649 | PLX4032       | COLO829 human melanoma cell line   | GPL6244 | 0.229 | 1.000 |
| 15 | GSE19286 | Captopril     | NA                               | GPL1261 | GSE17297 | PRISTANE      | Mesentery - DBA mice               | GPL1261 | 0.225 | 0.048 |
| 16 | GSE35011 | Rosiglitazone | stromal-vascular cells           | GPL8321 | GSE7111  | resveratrol   | 3T3-L1 progenitor adipocytes       | GPL1261 | 0.224 | 0.154 |
| 17 | GSE43695 | Bleomycin     | LUNG                             | GPL6246 | GSE25640 | Bleomycin     | Lung                               | GPL1261 | 0.223 | 1.000 |
| 18 | GSE29828 | EPZ004777     | MV4 -11 leukemia cell line       | GPL570  | GSE24493 | Imatinib      | NA                                 | GPL570  | 0.221 | 0.174 |
| 19 | GSE1922  | Imatinib      | K562 leukemia cell line          | GPL96   | GSE19567 | Imatinib      | K562 cells                         | GPL571  | 0.218 | 1.000 |
| 20 | GSE53394 | Estradiol     | MCF-7                            | GPL96   | GSE11352 | Estradiol     | NA                                 | GPL570  | 0.217 | 1.000 |
| 21 | GSE17624 | Bisphenol A   | Ishikawa endometrial cells       | GPL570  | GSE8588  | PBDE 47       | Adrenocortical carcinoma cell line | GPL570  | 0.217 | 0.175 |
| 22 | GSE15129 | ubiquinol     | Brain                            | GPL1261 | GSE11291 | resveratrol   | neocortex                          | GPL1261 | 0.217 | 0.052 |
| 23 | GSE23743 | Imatinib      | NA                               | GPL571  | GSE24493 | Imatinib      | NA                                 | GPL570  | 0.215 | 1.000 |
| 24 | GSE35011 | Rosiglitazone | stromal-vascular cells           | GPL8321 | GSE17297 | PRISTANE      | Mesentery - DBA mice               | GPL1261 | 0.215 | 0.034 |
| 25 | GSE17297 | PRISTANE      | Mesentery                        | GPL1261 | GSE42813 | Vitamin E     | aorta                              | GPL1261 | 0.215 | 0.467 |
| 26 | GSE4025  | Tamoxifen     | NA                               | GPL96   | GSE4668  | Estradiol     | MCF7/BUS human breast cancer cells | GPL96   | 0.214 | 0.070 |
| 27 | GSE46924 | Estradiol     | MCF-7 cell line                  | GPL570  | GSE26834 | Estradiol     | MCF-7 breast cancer cells          | GPL571  | 0.213 | 1.000 |
| 28 | GSE2640  | Bleomycin     | NA                               | GPL339  | GSE2565  | Phosgene      | Lungs                              | GPL339  | 0.213 | 0.011 |
| 29 | GSE35011 | Rosiglitazone | NA                               | GPL8321 | GSE21329 | troglitazone  | adipose tissue                     | GPL341  | 0.211 | 0.398 |
| 30 | GSE8597  | Estradiol     | NA                               | GPL570  | GSE26834 | Estradiol     | MCF-7 breast cancer cells          | GPL571  | 0.207 | 1.000 |
| 31 | GSE1458  | rosiglitazone | 3T3-L1 adipocytes                | GPL81   | GSE35011 | Rosiglitazone | NA                                 | GPL8321 | 0.207 | 1.000 |
| 32 | GSE53394 | Estradiol     | MCF-7                            | GPL96   | GSE4668  | Estradiol     | MCF7/BUS human breast cancer cells | GPL96   | 0.203 | 1.000 |
| 33 | GSE1922  | Imatinib      | K562 leukemia cell line          | GPL96   | GSE19567 | Nilotinib     | K562 cells                         | GPL571  | 0.201 | 0.510 |
| 34 | GSE4025  | Tamoxifen     | NA                               | GPL96   | GSE4668  | Estradiol     | MCF7/BUS human breast cancer cells | GPL96   | 0.201 | 0.070 |
| 35 | GSE1922  | Imatinib      | K562 leukemia cell line          | GPL96   | GSE19567 | Nilotinib     | K562 cells                         | GPL571  | 0.199 | 0.510 |

|    |          |                   |                                                                          |          |          |              |                                       |         |       |       |
|----|----------|-------------------|--------------------------------------------------------------------------|----------|----------|--------------|---------------------------------------|---------|-------|-------|
| 36 | GSE1922  | Imatinib          | K562 leukemia cell line                                                  | GPL96    | GSE19567 | Nilotinib    | K562 cells                            | GPL571  | 0.199 | 0.510 |
| 37 | GSE35011 | Rosiglitazone     | NA                                                                       | GPL8321  | GSE21329 | Pioglitazone | adipose                               | GPL341  | 0.199 | 0.600 |
| 38 | GSE53394 | Estradiol         | MCF-7 breast cancer (BC) cells                                           | GPL96    | GSE4668  | Estradiol    | NA                                    | GPL96   | 0.199 | 1.000 |
| 39 | GSE17297 | PRISTANE          | Mesentery - DBA mice - Day 3                                             | GPL1261  | GSE15129 | coenzyme Q10 | liver                                 | GPL1261 | 0.198 | 0.072 |
| 40 | GSE11670 | Deferasirox       | K562 (human myeloid leukemia cells)                                      | GPL570   | GSE24493 | Imatinib     | NA                                    | GPL570  | 0.198 | 0.197 |
| 41 | GSE1922  | Imatinib          | K562 leukemia cell line (VIII)                                           | GPL96    | GSE19567 | Nilotinib    | K562 cells                            | GPL571  | 0.197 | 0.510 |
| 42 | GSE11670 | Deferasirox       | K562 (human myeloid leukemia cells)                                      | GPL570   | GSE8565  | Argyirin A   | MCF7 breast adenocarcinoma cells      | GPL570  | 0.197 | 0.143 |
| 43 | GSE43695 | Bleomycin         | Lung (Fra-1 deficient mutants)                                           | GPL6246  | GSE25640 | Bleomycin    | Lung                                  | GPL1261 | 0.196 | 1.000 |
| 44 | GSE12211 | imatinib (glivec) | Philadelphia chromosome positive CML CD34+ cells                         | GPL571   | GSE6930  | Doxorubicin  | A673                                  | GPL4685 | 0.194 | 0.131 |
| 45 | GSE1922  | Imatinib          | K562 leukemia cell line (VIII)                                           | GPL96    | GSE19567 | Imatinib     | K562 cells                            | GPL571  | 0.193 | 1.000 |
| 46 | GSE1922  | Imatinib          | K562 leukemia cell line                                                  | GPL96    | GSE19567 | Imatinib     | K562 cells                            | GPL571  | 0.192 | 1.000 |
| 47 | GSE37441 | Vemurafenib       | SK-MEL-28 melanoma cell line (vemurafenib sensitive cell line) - 6 Hours | GPL10558 | GSE24862 | PLX4032      | M249 melanoma cell line               | GPL6244 | 0.192 | 1.000 |
| 48 | GSE11670 | Deferasirox       | K562 (human myeloid leukemia cells)                                      | GPL570   | GSE8565  | Argyirin A   | MCF7 breast adenocarcinoma cells      | GPL570  | 0.192 | 0.143 |
| 49 | GSE54711 | PLX4032           | WM164 BRAF mutant Melanoma cells                                         | GPL6244  | GSE50649 | PLX4032      | COLO829 human melanoma cell line-MITF | GPL6244 | 0.192 | 1.000 |
| 50 | GSE29828 | EPZ004777         | MV4 -11 leukemia cell line - Day 6                                       | GPL570   | GSE23743 | Imatinib     | NA                                    | GPL571  | 0.191 | 0.174 |

Supplementary table 5. Tables of top-matched drugs and potential predicted mimickers

| Drug          | geo_id   | pert_id       | pert_desc               | pubchem_id | score  |
|---------------|----------|---------------|-------------------------|------------|--------|
| cycloheximide | GSE8597  | BRD-A62184259 | NA                      | 2900       | 0.4988 |
|               |          | BRD-K36055864 | NA                      | 6197       | 0.5747 |
|               |          | BRD-K06792661 | Narciclasine            | 72376      | 0.5811 |
|               |          | BRD-K91370081 | NA                      | 253602     | 0.5873 |
|               |          | BRD-A62184259 | Cycloheximide           | 2900       | 0.6061 |
|               |          | BRD-A62184259 | NA                      | 2900       | 0.6089 |
|               |          | BRD-K03067624 | EMETINE HYDROCHLORIDE   | 10219      | 0.6115 |
|               |          | BRD-K80348542 | NA                      | 442195     | 0.6198 |
|               |          | BRD-A24643465 | homoharringtonine       | 16219462   | 0.6237 |
|               |          | BRD-A62184259 | Cycloheximide           | 2900       | 0.6273 |
|               |          | BRD-K36055864 | CYCLOHEXIMIDE           | 6197       | 0.6288 |
|               |          | BRD-A25687296 | NA                      | 5702048    | 0.6306 |
|               |          | BRD-A62184259 | NA                      | 2900       | 0.6311 |
|               |          | BRD-K80348542 | NA                      | 442195     | 0.6364 |
|               |          | BRD-A62184259 | NA                      | 2900       | 0.6375 |
|               |          | BRD-A62184259 | Cycloheximide           | 2900       | 0.6376 |
|               |          | BRD-K36055864 | CYCLOHEXIMIDE           | 6197       | 0.6416 |
|               |          | BRD-K76674262 | NA                      | 285033     | 0.6458 |
|               |          | BRD-A62184259 | Cycloheximide           | 2900       | 0.6464 |
|               |          | BRD-A62184259 | Cycloheximide           | 2900       | 0.6479 |
| Azacitidine   | GSE29077 | BRD-K03406345 | azacitidine             | 9444       | 0.8068 |
|               |          | BRD-K15563106 | NA                      | 4788       | 0.8098 |
|               |          | BRD-K64642496 | NA                      | 10322450   | 0.8114 |
|               |          | BRD-K44100512 | KIN001-043              | NA         | 0.8129 |
|               |          | BRD-K68336408 | Tyrphostin AG 1478      | 2051       | 0.8145 |
|               |          | BRD-K01121114 | AT-MLPCN CSC-006        | 49843203   | 0.8172 |
|               |          | BRD-A17065207 | Brefeldin A             | 5362868    | 0.8187 |
|               |          | BRD-A02481876 | Importazole             | 2949965    | 0.8207 |
|               |          | BRD-K03406345 | azacitidine             | 9444       | 0.8208 |
|               |          | BRD-K44100512 | KIN001-043              | NA         | 0.8222 |
|               |          | BRD-A47829399 | artesunate              | 73707396   | 0.826  |
|               |          | BRD-K23984367 | sorafenib               | 406563     | 0.8279 |
|               |          | BRD-K39503511 | MK-0591                 | 60923      | 0.828  |
|               |          | BRD-K97330509 | Src Kinase Inhibitor II | 1172104    | 0.8303 |
|               |          | BRD-K03816923 | Rottlerin               | 5281847    | 0.8305 |
|               |          | BRD-K03406345 | azacitidine             | 9444       | 0.8308 |
|               |          | BRD-A31107743 | 89671                   | 5353446    | 0.8332 |
|               |          | BRD-K03816923 | Rottlerin               | 5281847    | 0.8332 |
|               |          | BRD-K78513633 | Lonidamine              | 39562      | 0.8335 |

|             |          |               |                             |          |        |
|-------------|----------|---------------|-----------------------------|----------|--------|
|             |          | BRD-K21672174 | Ro 28-1675 ?                | 9886086  | 0.8337 |
| Tretinoin   | GSE1588  | BRD-K44100512 | KIN001-043                  | NA       | 0.8703 |
|             |          | BRD-K06854232 | NA                          | 2126     | 0.8998 |
|             |          | BRD-K71879491 | tretinoin                   | 444795   | 0.9015 |
|             |          | BRD-K49685476 | GR-105                      | 5289501  | 0.9019 |
|             |          | BRD-K74980345 | NA                          | 56643211 | 0.9048 |
|             |          | BRD-K44100512 | KIN001-043                  | NA       | 0.9052 |
|             |          | BRD-K62493605 | JAS07_009                   | 24747231 | 0.9052 |
|             |          | BRD-K44100512 | KIN001-043                  | NA       | 0.906  |
|             |          | BRD-K90699611 | Acitretin                   | 5284513  | 0.9067 |
|             |          | BRD-K06854232 | AM580                       | 2126     | 0.9081 |
|             |          | BRD-K76723084 | isotretinoin                | 5282379  | 0.9093 |
|             |          | BRD-K71879491 | tretinoin                   | 444795   | 0.9096 |
|             |          | BRD-K16189898 | CHIR-99021                  | 9956119  | 0.9098 |
|             |          | BRD-K08547377 | irinotecan hcl (trihydrate) | 23581792 | 0.9098 |
|             |          | BRD-K49685476 | GR-105                      | 5289501  | 0.9106 |
|             |          | BRD-K31342827 | GF 109203X                  | 2396     | 0.9114 |
|             |          | BRD-K35483542 | GR-101                      | 449171   | 0.912  |
|             |          | BRD-K68246049 | NA                          | 5354022  | 0.912  |
|             |          | BRD-K44100512 | KIN001-043                  | NA       | 0.9123 |
|             |          | BRD-K31342827 | GF-109203X                  | 2396     | 0.9128 |
| Vemurafenib | GSE37441 | BRD-K03618428 | PP-110                      | 24905203 | 0.517  |
|             |          | BRD-K03449891 | foretinib                   | 42642645 | 0.5288 |
|             |          | BRD-K03449891 | foretinib                   | 42642645 | 0.5297 |
|             |          | BRD-K49865102 | PD-0325901                  | 9826528  | 0.5349 |
|             |          | BRD-U51024685 | HG-6-64-01                  | NA       | 0.5379 |
|             |          | BRD-K16478699 | PLX-4720                    | 24180719 | 0.5404 |
|             |          | BRD-K16478699 | PLX-4720                    | 24180719 | 0.5411 |
|             |          | BRD-K56343971 | vemurafenib                 | 42611257 | 0.5417 |
|             |          | BRD-U60236422 | WH-4-025                    | NA       | 0.5418 |
|             |          | BRD-K03449891 | foretinib                   | 42642645 | 0.542  |
|             |          | BRD-K41895714 | AS605240                    | 10377751 | 0.5435 |
|             |          | BRD-K20696416 | NVP-AEW541                  | NA       | 0.5437 |
|             |          | BRD-K95435023 | PHA-665752                  | 10461815 | 0.5456 |
|             |          | BRD-K50140147 | NVP-TAE684                  | 16038120 | 0.546  |
|             |          | BRD-K49865102 | PD-0325901                  | 9826528  | 0.5464 |
|             |          | BRD-K98490050 | NA                          | 3926765  | 0.5467 |
|             |          | BRD-K49865102 | PD-0325901                  | 9826528  | 0.5471 |
|             |          | BRD-A58767537 | afatinib                    | 22225683 | 0.5474 |
|             |          | BRD-K05104363 | PD-184352                   | 6918454  | 0.548  |
|             |          | BRD-K24496482 | SB590885                    | NA       | 0.5485 |

|               |          |               |                                        |          |        |
|---------------|----------|---------------|----------------------------------------|----------|--------|
| Dexamethasone | GSE34313 | BRD-A69951442 | dexamethasone                          | 73707402 | 0.7743 |
|               |          | BRD-K46056750 | AZD-7762                               | 67077825 | 0.7814 |
|               |          | BRD-A79768653 | sirolimus                              | 5374464  | 0.7864 |
|               |          | BRD-A93255169 | THALIDOMIDE                            | 5426     | 0.7882 |
|               |          | BRD-A40639672 | KETOROLAC TROMETHAMINE                 | 3826     | 0.7903 |
|               |          | BRD-K24675965 | LY 288513                              | 2802894  | 0.7916 |
|               |          | BRD-A92177080 | BETAMETHASONE ACETATE                  | 45006158 | 0.7935 |
|               |          | BRD-K49328571 | dasatinib                              | 3062316  | 0.7938 |
|               |          | BRD-K30697463 | desoximetasone                         | 5311067  | 0.7942 |
|               |          | BRD-K23875128 | Rho kinase inhibitor III [rockout]     | 644354   | 0.7947 |
|               |          | BRD-A46186775 | HYDROCORTISONE PHOSPHATE TRIETHYLAMINE | 6602442  | 0.7955 |
|               |          | BRD-K32164935 | TOLAZAMIDE                             | 5503     | 0.7969 |
|               |          | BRD-K62310379 | fluticasone                            | 444036   | 0.7982 |
|               |          | BRD-A35108200 | Dexamethasone                          | 3003     | 0.8009 |
|               |          | BRD-A93255169 | THALIDOMIDE                            | 5426     | 0.8016 |
|               |          | BRD-A42628519 | IOPANIC ACID                           | 3735     | 0.8031 |
|               |          | BRD-K35240538 | methylprednisolone                     | 6741     | 0.8033 |
|               |          | BRD-A02180903 | BETAMETHASONE                          | 6710614  | 0.8047 |
|               |          | BRD-A15297126 | FLUOCINONIDE                           | 6710662  | 0.8065 |
|               |          | BRD-K23875128 | Rho kinase inhibitor III [rockout]     | 644354   | 0.8066 |
| Dexamethasone | GSE7683  | BRD-A01346607 | FLUMETHASONE                           | 5702178  | 0.8649 |
|               |          | BRD-K61480498 | GR-231                                 | 3247059  | 0.8665 |
|               |          | BRD-A10188456 | NA                                     | 5702035  | 0.8706 |
|               |          | BRD-A36010170 | NA                                     | 5702266  | 0.8758 |
|               |          | BRD-A69951442 | dexamethasone                          | 73707402 | 0.8779 |
|               |          | BRD-K30697463 | desoximetasone                         | 5311067  | 0.8787 |
|               |          | BRD-K71035033 | S1064                                  | 10074640 | 0.8788 |
|               |          | BRD-A67862938 | NA                                     | 312915   | 0.8794 |
|               |          | BRD-A27887842 | NA                                     | 5702106  | 0.8805 |
|               |          | BRD-A49765801 | NA                                     | 5702172  | 0.8811 |
|               |          | BRD-K28470988 | L-690,330                              | 132449   | 0.8829 |
|               |          | BRD-A42628519 | NA                                     | 3735     | 0.8839 |
|               |          | BRD-K81709173 | NA                                     | 443943   | 0.8849 |
|               |          | BRD-A40639672 | NA                                     | 3826     | 0.8853 |
|               |          | BRD-K49865102 | PD-0325901                             | 9826528  | 0.8855 |
|               |          | BRD-A93424738 | NA                                     | 5702036  | 0.8857 |
|               |          | BRD-A92439610 | TRIAMCINOLONE ACETONIDE                | 5702126  | 0.886  |
|               |          | BRD-K69328504 | L-690,488                              | 5132514  | 0.8864 |
|               |          | BRD-K69328504 | L-690,488                              | 5132514  | 0.8865 |
|               |          | BRD-K51556300 | NA                                     | 44506645 | 0.8865 |
| Dexamethasone | GSE54608 | BRD-A01346607 | FLUMETHASONE                           | 5702178  | 0.8465 |

|                |         |               |                                        |          |        |
|----------------|---------|---------------|----------------------------------------|----------|--------|
|                |         | BRD-A42628519 | IOPANIC ACID                           | 3735     | 0.8606 |
|                |         | BRD-A35108200 | Dexamethasone                          | 3003     | 0.8619 |
|                |         | BRD-A35108200 | betamethasone                          | 3003     | 0.8659 |
|                |         | BRD-A02180903 | BETAMETHASONE                          | 6710614  | 0.8661 |
|                |         | BRD-A46186775 | HYDROCORTISONE PHOSPHATE TRIETHYLAMINE | 6602442  | 0.8667 |
|                |         | BRD-A49765801 | FLURANDRENOLIDE                        | 5702172  | 0.867  |
|                |         | BRD-A26095496 | CLOBETASOL PROPIONATE                  | 5702274  | 0.8688 |
|                |         | BRD-A66861218 | BETAMETHASONE 17,21-DIPROPIONATE       | 6708733  | 0.8691 |
|                |         | BRD-K07668032 | NCGC00012272-02                        | 3234850  | 0.8694 |
|                |         | BRD-A82238138 | Budesonide                             | 2462     | 0.871  |
|                |         | BRD-A60571864 | BUDESONIDE                             | 5702148  | 0.8713 |
|                |         | BRD-K29173907 | Isoflupredone acetate                  | 224246   | 0.8715 |
|                |         | BRD-A92177080 | BETAMETHASONE ACETATE                  | 45006158 | 0.8738 |
|                |         | BRD-K24675965 | LY 288513                              | 2802894  | 0.8742 |
|                |         | BRD-A37780065 | TRIAMCINOLONE                          | 5702125  | 0.8745 |
|                |         | BRD-A69951442 | dexamethasone                          | 73707402 | 0.8747 |
|                |         | BRD-A35108200 | Dexamethasone                          | 3003     | 0.8755 |
|                |         | BRD-K28470988 | L-690,330                              | 132449   | 0.8775 |
|                |         | BRD-A15297126 | FLUOCINONIDE                           | 6710662  | 0.8776 |
|                |         | BRD-K87909389 | alvocidib                              | 5287969  | 0.9428 |
|                |         | BRD-K43389698 | BMS-387032                             | 3025986  | 0.9433 |
|                |         | BRD-K79090631 | CGP-60474                              | 644215   | 0.9448 |
|                |         | BRD-K21680192 | mitoxantrone                           | 5458171  | 0.9453 |
|                |         | BRD-K87909389 | alvocidib                              | 5287969  | 0.9459 |
|                |         | BRD-K13390322 | AT-7519                                | 11338033 | 0.9461 |
|                |         | BRD-K23984367 | sorafenib                              | 406563   | 0.9475 |
|                |         | BRD-K87909389 | alvocidib                              | 5287969  | 0.9477 |
|                |         | BRD-K56343971 | vemurafenib                            | 42611257 | 0.9478 |
|                |         | BRD-K87909389 | alvocidib                              | 5287969  | 0.9481 |
|                |         | BRD-K79090631 | CGP-60474                              | 644215   | 0.9487 |
|                |         | BRD-K43389698 | BMS-387032                             | 3025986  | 0.9487 |
|                |         | BRD-K49865102 | PD-0325901                             | 9826528  | 0.949  |
|                |         | BRD-K79090631 | CGP-60474                              | 644215   | 0.9491 |
|                |         | BRD-K19220233 | JNK-9L                                 | 59588070 | 0.9493 |
|                |         | BRD-K43389698 | BMS-387032                             | 3025986  | 0.9494 |
|                |         | BRD-K13390322 | AT-7519                                | 11338033 | 0.9494 |
|                |         | BRD-K43389698 | BMS-387032                             | 3025986  | 0.9498 |
|                |         | BRD-K43389698 | BMS-387032                             | 3025986  | 0.9501 |
|                |         | BRD-K56751279 | Y-39983                                | 9810884  | 0.9504 |
| trichostatin A | GSE1437 | BRD-K04887706 | AKT-inhibitor-1-2                      | 10196499 | 0.8798 |
|                |         | BRD-K45044657 | NA                                     | NA       | 0.8893 |

|                    |          |               |                         |          |        |
|--------------------|----------|---------------|-------------------------|----------|--------|
|                    |          | BRD-K81418486 | vorinostat              | 5311     | 0.8931 |
|                    |          | BRD-A19037878 | trichostatin A          | 6376322  | 0.8932 |
|                    |          | BRD-K77908580 | S1053                   | 4261     | 0.8951 |
|                    |          | BRD-K53308430 | NA                      | 44507247 | 0.8961 |
|                    |          | BRD-A19037878 | trichostatin A          | 6376322  | 0.8963 |
|                    |          | BRD-K68202742 | trichostatin A          | 444732   | 0.8978 |
|                    |          | BRD-K77908580 | NA                      | 4261     | 0.8984 |
|                    |          | BRD-K53308430 | NA                      | 44507247 | 0.8986 |
|                    |          | BRD-A39646320 | H7270                   | 3571     | 0.8987 |
|                    |          | BRD-K53903639 | 480743.cdx              | 19582717 | 0.8988 |
|                    |          | BRD-K77908580 | S1053                   | 4261     | 0.8994 |
|                    |          | BRD-A19037878 | trichostatin A          | 6376322  | 0.9    |
|                    |          | BRD-K52522949 | NA                      | 11395181 | 0.9004 |
|                    |          | BRD-A42649439 | API-2                   | 290486   | 0.9014 |
|                    |          | BRD-K52522949 | NA                      | 11395181 | 0.9014 |
|                    |          | BRD-A19037878 | trichostatin A          | 6376322  | 0.9025 |
|                    |          | BRD-K77908580 | NA                      | 4261     | 0.9032 |
|                    |          | BRD-K81418486 | vorinostat              | 5311     | 0.9034 |
| Tretinoin          | GSE32161 | BRD-K06926592 | NA                      | 444795   | 0.8034 |
|                    |          | BRD-K68246049 | NA                      | 5354022  | 0.812  |
|                    |          | BRD-K71879491 | tretinoin               | 444795   | 0.8146 |
|                    |          | BRD-K90699611 | Acitretin               | 5284513  | 0.8171 |
|                    |          | BRD-K06854232 | AM580                   | 2126     | 0.8188 |
|                    |          | BRD-K06926592 | Isotretinoin            | 444795   | 0.82   |
|                    |          | BRD-A96799240 | GR-109                  | 6438629  | 0.8214 |
|                    |          | BRD-K35483542 | R4643                   | 449171   | 0.8236 |
|                    |          | BRD-K71879491 | tretinoin               | 444795   | 0.8333 |
|                    |          | BRD-K06854232 | NA                      | 2126     | 0.8401 |
|                    |          | BRD-K62012036 | GR-108                  | 5284513  | 0.8406 |
|                    |          | BRD-K06854232 | NA                      | 2126     | 0.8476 |
|                    |          | BRD-K06926592 | Isotretinoin            | 444795   | 0.8503 |
|                    |          | BRD-K51290057 | NA                      | 6184667  | 0.8544 |
|                    |          | BRD-A17718497 | NA                      | 46912148 | 0.8591 |
|                    |          | BRD-K76723084 | isotretinoin            | 5282379  | 0.8617 |
|                    |          | BRD-K49685476 | GR-105                  | 5289501  | 0.8628 |
|                    |          | BRD-K35483542 | GR-101                  | 449171   | 0.8629 |
|                    |          | BRD-K49685476 | GR-105                  | 5289501  | 0.8652 |
|                    |          | BRD-K78844995 | NA                      | 127898   | 0.8681 |
| Methylprednisolone | GSE490   | BRD-A92439610 | TRIAMCINOLONE ACETONIDE | 5702126  | 0.8619 |
|                    |          | BRD-K35240538 | methylprednisolone      | 6741     | 0.8657 |
|                    |          | BRD-K20696416 | NVP-AEW541              | NA       | 0.8661 |



|             |          |               |                                    |          |        |
|-------------|----------|---------------|------------------------------------|----------|--------|
|             |          | BRD-K31627533 | NA                                 | 5311412  | 0.8666 |
|             |          | BRD-K70771662 | 11K-629S                           | 1471787  | 0.8683 |
|             |          | BRD-A07000685 | HYDROCORTISONE HEMISUCCINATE       | 5702069  | 0.8695 |
|             |          | BRD-K16533489 | NA                                 | 23891056 | 0.8702 |
|             |          | BRD-A65767837 | HYDROCORTISONE ACETATE             | 5702068  | 0.8705 |
|             |          | BRD-A25687296 | NA                                 | 5702048  | 0.8706 |
|             |          | BRD-A98283014 | C3930                              | 644274   | 0.8707 |
|             |          | BRD-A13133631 | FLUOROMETHOLONE                    | 5702058  | 0.8731 |
|             |          | BRD-A75409952 | wortmannin                         | 5691     | 0.8732 |
|             |          | BRD-K40175214 | torin-1                            | 49836027 | 0.8746 |
|             |          | BRD-U25771771 | NA                                 | NA       | 0.8748 |
|             |          | BRD-A26199074 | 2561                               | 2531     | 0.8764 |
|             |          | BRD-K04853698 | LDN-193189                         | 25195294 | 0.8766 |
|             |          | BRD-K30697463 | desoximetasone                     | 5311067  | 0.877  |
|             |          | BRD-K23875128 | Rho kinase inhibitor III [rockout] | 644354   | 0.8771 |
|             |          | BRD-K63770300 | NCGC00188740-01                    | 56643207 | 0.8771 |
|             |          | BRD-K35960502 | NICLOSAMIDE                        | 4477     | 0.8773 |
|             |          | BRD-K92093830 | doxorubicin                        | 443939   | 0.7096 |
|             |          | BRD-K03829970 | NA                                 | 53338854 | 0.7132 |
|             |          | BRD-K92093830 | Doxorubicin hydrochloride          | 443939   | 0.7232 |
|             |          | BRD-K21680192 | mitoxantrone                       | 5458171  | 0.7291 |
|             |          | BRD-U64521890 | XMD16-144                          | NA       | 0.7311 |
|             |          | BRD-K04548931 | epirubicin                         | 65348    | 0.7327 |
|             |          | BRD-K21680192 | mitoxantrone                       | 5458171  | 0.7335 |
|             |          | BRD-K11927976 | NA                                 | 9799509  | 0.7364 |
|             |          | BRD-K64890080 | BI 2536                            | 11364421 | 0.7385 |
|             |          | BRD-K21680192 | mitoxantrone                       | 5458171  | 0.7385 |
|             |          | BRD-A13122391 | 16-HYDROXYTRIPTOLIDE               | 16220015 | 0.7455 |
|             |          | BRD-K83794624 | P8624                              | 11296583 | 0.7464 |
|             |          | BRD-K83794624 | P8624                              | 11296583 | 0.7465 |
|             |          | BRD-K19724398 | NA                                 | 53338857 | 0.7475 |
|             |          | BRD-K13514097 | S1120                              | 6442177  | 0.7481 |
|             |          | BRD-K04548931 | NA                                 | 65348    | 0.7503 |
|             |          | BRD-K21680192 | mitoxantrone                       | 5458171  | 0.7506 |
|             |          | BRD-K21680192 | mitoxantrone                       | 5458171  | 0.7511 |
|             |          | BRD-U64521890 | XMD16-144                          | NA       | 0.754  |
|             |          | BRD-K21680192 | mitoxantrone                       | 5458171  | 0.7547 |
|             |          | BRD-K03618428 | PP-110                             | 24905203 | 0.7653 |
|             |          | BRD-K69932463 | AZD8055                            | 25262965 | 0.7709 |
|             |          | BRD-K19687926 | lapatinib                          | 208908   | 0.7758 |
|             |          | BRD-A75409952 | wortmannin                         | 5691     | 0.7828 |
| Doxorubicin | GSE58074 |               |                                    |          |        |
| Lapatinib   | GSE38376 |               |                                    |          |        |

|  |  |               |            |          |        |
|--|--|---------------|------------|----------|--------|
|  |  | BRD-K34581968 | BMS-536924 | 11353973 | 0.7833 |
|  |  | BRD-K03618428 | PP-110     | 24905203 | 0.7839 |
|  |  | BRD-A18328003 | GDC-0980   | NA       | 0.7843 |
|  |  | BRD-K12184916 | NA         | 11977753 | 0.7845 |
|  |  | BRD-A18328003 | GDC-0980   | NA       | 0.7845 |
|  |  | BRD-A58767537 | afatinib   | 22225683 | 0.7848 |
|  |  | BRD-A75409952 | wortmannin | 5691     | 0.785  |
|  |  | BRD-K67868012 | PI-103     | 9884685  | 0.7853 |
|  |  | BRD-K52911425 | GDC-0941   | 17755052 | 0.7857 |
|  |  | BRD-K08799216 | pelitinib  | 6445562  | 0.7859 |
|  |  | BRD-K67566344 | KU-0063794 | 16736978 | 0.786  |
|  |  | BRD-K69932463 | AZD8055    | 25262965 | 0.7866 |
|  |  | BRD-K03618428 | PP-110     | 24905203 | 0.7874 |
|  |  | BRD-K08799216 | pelitinib  | 6445562  | 0.7885 |
|  |  | BRD-A18328003 | GDC-0980   | NA       | 0.7886 |
|  |  | BRD-K12994359 | Valdecoxib | 119607   | 0.7888 |
